## Title:

# The development of compulsive coping behaviors depends on the engagement of dorsolateral striatum dopamine-dependent mechanisms

## Abbreviated Title:

Coping habits promote compulsivity

## Authors:

Chiara Giuliano<sup>1,2 \*</sup>, Lucia Marti-Prats<sup>1 \*</sup>, Ana Domi<sup>1,3</sup>, Mickaël Puaud<sup>1</sup>, Yolanda Pena-Oliver<sup>1,4</sup>, Colin McKenzie<sup>1</sup>, Barry J. Everitt<sup>1</sup>, David Belin<sup>1</sup>

<sup>1</sup> Behavioural and Clinical Neuroscience Institute and Department of Psychology, University of Cambridge, Downing Street, Cambridge CB2 3EB, UK.

<sup>2</sup> Current address: Astra Zeneca, R&D Biopharmaceuticals, Fleming Building (B623), Babraham Research Park, Babraham, Cambridgeshire CB22 3AT, UK.

<sup>3</sup> Current address: Department of Psychiatry and Neurochemistry, Institute of Neuroscience and Physiology, Sahlgrenska Academy University of Gothenburg, Box 410, Gothenburg 405 30, Sweden.

<sup>4</sup> Current Address: Research and Enterprise Services, University of Sussex, Brighton, UK.

\* co-first authors

Corresponding author:

Dr David Belin

Department of Psychology,  
University of Cambridge  
Downing St.

Cambridge CB2 3EB, UK  
Tel. +44 (0)1223333588

Fax. +44 (0)1223 333564  
email: [bdb26@cam.ac.uk](mailto:bdb26@cam.ac.uk)

## Keywords:

Schedule-induced polydipsia; compulsivity; alcohol; coping; anterior dorsolateral striatum.

Number of pages: 20 (with figures 25),

Number of figures: 4

Number of tables: 0

Number of words: 11448

Abstract: 246

Introduction: 571 (with references)

Discussion: 1853 (with references)

### **Conflict of Interest:**

The authors declare no competing financial interests.

### **Acknowledgements:**

This work, carried out at the department of Psychology of the University of Cambridge, was funded by a UKRI grant (MR/N02530X/1) to BJE and DB, Brain and Behavior Research Foundation NARSAD Young Investigator Grant (RG95599 Grant ID: 27353) to CG, and Leverhulme Trust Early Career (ECF-2018-713) and Isaac Newton Trust fellowship (18.08(g)) to LMP.

For the purpose of open access, the author has applied a Creative Commons Attribution (CC BY) licence to any Author Accepted Manuscript version arising.

The data can be available at: [https://drive.google.com/drive/folders/1\\_qrEP-ztVDG3IOMR6Ytza5cKnCbbVvzn?usp=sharing](https://drive.google.com/drive/folders/1_qrEP-ztVDG3IOMR6Ytza5cKnCbbVvzn?usp=sharing)

We authors would like to thank Drs Aude Belin-Rauscent, Antonio Ferragud and Clara Velazquez-Sanchez, as well as Laetitia Ward, for technical assistance with behavioral training.

## Abstract

Humans greatly differ in how they cope with stress, a natural behavior learnt through negative reinforcement. Some individuals engage in displacement activities, others in exercise or comfort eating, and others still in alcohol use. Across species, adjunctive behaviors, such as polydipsic drinking, are used as a form of displacement activity that reduces distress. Some individuals, in particular those that use alcohol to self-medicate, tend to lose control over such coping behaviors, which become excessive and compulsive. However, the psychological and neural mechanisms underlying this individual vulnerability have not been elucidated. Here we tested the hypothesis that the development of compulsive adjunctive behaviors stems from the functional engagement of the dorsolateral striatum (DLS) dopamine-dependent habit system after a prolonged history of adjunctive responding. We measured in longitudinal studies in male Sprague Dawley rats the sensitivity of early established vs compulsive polydipsic water or alcohol drinking to a bilateral infusion of the dopamine receptor antagonist  $\alpha$ -flupentixol into the anterior DLS (aDLS). While most rats acquired a polydipsic drinking response with water, others only did so with alcohol. Whether reliant on water or alcohol, the reacquisition of this coping response was insensitive to aDLS dopamine receptor blockade. In contrast, after prolonged experience, adjunctive drinking became dependent on the aDLS dopamine-dependent habit system at a time it was compulsive in vulnerable individuals. These data suggest that habits may develop out of negative reinforcement and that the engagement of their underlying striatal system is necessary for the manifestation of adjunctive behaviors.

## Significance statement:

Harnessing the individual variability that rodents, like humans, show to engage in adaptive or maladaptive coping strategies, which can result in the development of compulsive disorders, here we demonstrate that the functional engagement of the dorsolateral striatum-dependent habit system precipitates the transition to compulsion in rats that have acquired a polydipsic adjunctive drinking response with water or alcohol as a means to cope with distress. The results of this study not only provide evidence for the emergence of instrumental habits under negative reinforcement, but they also reveal that compulsive behaviors that originate from the loss of control over coping strategies are mediated by the dorsolateral striatum-dependent habit system.

## Introduction

When facing the distress generated by a challenging, emotionally taxing, aversive situation, individuals greatly differ in the emotion regulation strategy they use, which is influenced by situational demands (1-6). Emotion regulation and associated coping strategies (7), such as exercise, comfort eating, shopping, or displacement behaviors (8, 9), which all decrease stress through negative reinforcement, have long been suggested to be a prerequisite for adaptive functioning, the promotion of resilience and well-being (10, 11).

Several species cope with stress using a form of displacement called adjunctive behaviors (12, 13). One such adjunctive anxiolytic response, schedule-induced polydipsia (SIP) (12-15), manifests itself as polydipsic water intake in the face of intermittent food delivery in food-restricted animals (16-18). At the population level, non-regulatory polydipsic drinking develops over a week and remains stable for long periods of time during which it selectively decreases the levels of stress-related hormones that had been increased by the associated intermittent food delivery (14, 15, 19-22).

However, some humans (23-30) and individuals of other species (31) characterized, for instance by a high impulsivity trait (32), lose control over these coping strategies which become excessive and promote the development of compulsive disorders such as obsessive compulsive and substance use disorders.

As exemplified by the emotion regulation challenges the COVID-19 pandemic has posed (33-36), under circumstances perceived as overwhelming, some individuals resort to alternative means to cope with stress, such as the use of alcohol (37-42) or other drugs (43), a strategy associated with a greater vulnerability to develop compulsivity (42, 44-52). Across species the individual tendency to rely on the anxiolytic properties of alcohol to cope with distress (44, 52, 53), including that induced by the SIP procedure (54), has been associated with an increased vulnerability to switch from controlled to compulsive alcohol use, a key feature of alcohol use disorder (AUD) (44, 51, 52, 54-56).

However, the psychological and neural basis of the individual vulnerability to lose control over coping behaviors, involving alcohol use or not, and the ensuing development of compulsivity have not been defined. Increasing evidence suggests that the transition from controlled goal-directed behaviors to compulsion, including the compulsive seeking and drinking of alcohol (57, 58) and the development of compulsive adjunctive polydipsic drinking, is dependent on a shift in the locus of control over behavior from the ventral to the dorsolateral striatum (DLS)-dependent habit system (59). Thus, while the reinforcing properties of alcohol mediated by the mesolimbic system support recreational alcohol use (60, 61), it is the engagement of anterior DLS (aDLS) dopamine (DA) dependent alcohol seeking habits that promotes the transition to compulsive alcohol seeking and drinking (57, 58, 61). Similarly, the development of adjunctive polydipsic water drinking behavior, but not its compulsive manifestation, is dependent on the mesolimbic system (62, 63) while well-established excessive, compulsive adjunctive water drinking in vulnerable individuals has been associated with an increased spine density in DLS medium spiny neurons (64).

Here we tested the hypothesis that the development of compulsive coping behavior, as manifested as excessive polydipsic drinking, whether of alcohol or water, is associated with functional engagement of, and an increased reliance on, the DLS-DA dependent habit system. To test this hypothesis, we assessed the sensitivity of the polydipsic water or alcohol drinking response of each individual in large cohorts of outbred rats to bilateral aDLS DA receptor blockade (54, 58, 65) over the course of the acquisition of each coping behavior and the subsequent transition to compulsivity.

## Methods and Materials

### Subjects

Ninety-four male Sprague Dawley rats (Charles River, UK), from three different cohorts, weighing 300-350g at the start of the experiments, were used in this study. Rats were single-housed under a 12-hour reversed light/dark cycle (lights off at 7:00 AM) and food restricted to gradually reach 85% of their theoretical free-feeding body weight before the start of the behavioral training. Water was always available *ad libitum*. Experiments were performed 6-7 days/week between 8 am-5 pm. All experimental protocols were conducted under the project license 70/8072 held by David Belin in accordance with the regulatory requirement of the UK Animals (Scientific Procedures) Act 1986, amendment regulations 2012, following ethical review by the University of Cambridge Animal Welfare and Ethical Review Body (AWERB).

## Experimental procedures

The series of experiments conducted in this study are schematically summarised in [Figure 1](#).

The first experiment aimed to determine the involvement of aDLS DA-dependent mechanisms (referred to subsequently as aDLS DA) in the acquisition of a coping adjunctive water drinking response. Thus, after a week of habituation to the vivarium, thirty-six rats received bilateral cannulations of the aDLS and, following recovery, were food restricted to progressively reach 85% of their theoretical free-feeding weight. Rats were then trained in the SIP procedure with water (SIPw). Following one habituation and one baseline session (see SIP section below), rats were exposed to five 60-min SIPw sessions before the sensitivity of their early adjunctive water drinking to aDLS DA receptor blockade was measured (**Test 1, Effect of  $\alpha$ -flu on Early SIPw**). Fourteen rats were excluded from the experiment because of loss of their guide cannula or cannula misplacements, so that twenty-two rats were included in the final analysis.

The second experiment aimed to test the reliance on aDLS DA of well-established adjunctive water drinking vs that of early and well-established adjunctive alcohol drinking. Thus, following a week of habituation to the vivarium, forty-eight rats were food restricted to progressively reach 85% of their theoretical free-feeding weight before starting behavioral training. Following one habituation and one baseline session (see SIP section below), rats were exposed to twenty 60-min SIPw sessions, e.g., until the establishment of aberrant, compulsive, levels of water intake in vulnerable individuals (31, 32, 54, 66). Rats were subsequently implanted bilaterally with intra aDLS cannulae and, following recovery, they were re-baselined under SIPw for ten sessions before the reliance of their well-established adjunctive water drinking on aDLS DA was measured (**Test 2, Effect of  $\alpha$ -flu on Late SIPw**). Then, water was replaced by 10% alcohol and rats were trained to maintain their adjunctive behavior now using alcohol (SIP with alcohol, SIPa), or to acquire the coping response for those that rely on alcohol to cope with distress, as previously described (54). The reliance of early and well-established adjunctive alcohol drinking on aDLS DA was measured after three (**Test 3, Effect of  $\alpha$ -flu on Early SIPa**) or twenty daily sessions (**Test 4, Effect of  $\alpha$ -flu on Late SIPa**), respectively. Because ten individuals lost their cannulae or had misplaced cannulae as revealed after post-mortem histological assessment, thirty-eight rats were included in the final analysis.

The third experiment aimed to test the stability of polydipsic water intake levels over a period of training in the SIP procedure similar to that of rats in experiment 2. Thus, after a week of habituation to the vivarium, ten rats were food restricted to progressively reach 85% of their theoretical free-feeding weight before starting behavioral training. Following one habituation and one baseline session (see SIP section below), rats were exposed to forty 60-min SIPw sessions.

## Schedule-induced polydipsia (SIP)

### Apparatus

SIP training was carried out as previously described (32, 66, 67) in twelve operant chambers located within ventilated sound-attenuating cubicles (Med associates, St. Albans, USA) and

made of aluminium and transparent acrylic plastic with a stainless-steel grid floor (24 cm x 25.4 cm x 26.7 cm). Chambers were equipped with a house light (3-W), a food tray (magazine) installed at the centre of the front wall, and a bottle from which a stainless-steel sipper tube delivered water or alcohol into a receptacle placed in a magazine on the wall opposite the food magazine. Water or alcohol were freely available throughout the 60-min sessions.

### Behavioral training

SIP training consisted of the following stages:

#### Habituation / baseline water intake

During the habituation session, rats were given access to water and sixty food pellets (45 mg, TestDiet, USA) that had been placed in the magazine. The volume of water consumed by each rat over this 60-min session was measured in order to determine the amount of water each individual drank to meet their homeostatic needs while eating sixty 45 mg pellets. Rats were then tested in one 60-min magazine training session during which sixty food pellets were delivered under a variable interval 60-second schedule (VI-60 s) over 60 min. This magazine training provided the baseline level of homeostatic water intake over one hour.

#### SIP with water (SIPw)

The SIP procedure was based on a fixed-time 60-second (FT-60 s) schedule of food delivery, previously shown to induce adjunctive drinking behavior with robust and persistent individual differences in the tendency to develop excessive, compulsive adjunctive drinking behavior (32, 54, 66, 68, 69).

Twenty-four hours after the baseline session, rats underwent five (Experiment 1), twenty (Experiment 2) or forty (Experiment 3) of these 60 min FT-60 s SIPw training sessions. 300 mL bottles filled with fresh water were weighed and inserted into the operant box immediately prior to the initiation of each session. House lights were switched on at the beginning and switched off at the end of each session. The total amount of water consumed (mL) was calculated daily as the difference between the weights of the bottle before and after the session.

Individuals whose average water consumption over the last three days of training was in the upper and lower quartiles of the population were considered as high (HD) and low drinkers (LD), respectively, as previously described (32, 54, 66).

#### SIP alcohol (SIPa)

Twenty-four hours after the last SIPw session, water was replaced by 10% alcohol and rats were trained for twenty 60-min SIPa sessions. The total amount of alcohol consumed (mL) was calculated daily as the difference between the weights of the bottle before and after the session.

### Drugs

The alcohol solution was prepared by mixing 99.8% ethanol (Sigma-Aldrich, UK) with tap water to obtain 10% alcohol (54, 67).

The DA receptor antagonist  $\alpha$ -flupentixol (Sigma-Aldrich, UK) was dissolved in double-distilled water as previously described (70). Drug doses (6 or 12  $\mu$ g/side), reported in the salt form were selected to be in the range of those previously shown effectively to decrease aDLS-dependent cocaine, heroin or alcohol seeking behavior (58, 70-72).

### Surgery: aDLS cannulations

Rats underwent stereotaxic surgery either before behavioral training (Experiment 1), or after acquisition of SIPw (Experiment 2) under isoflurane anaesthesia (O<sub>2</sub>: 2L/min, 5% isoflurane for induction and 2 % for maintenance), as previously described (58). Guide cannulae (22-

gauge, Plastics One, Roanoke, VA, USA) were bilaterally implanted 2 mm above the aDLS (anterior/posterior (AP) +1.2, mediolateral (ML)  $\pm$ 3, dorsal/ventral (DV) -3; AP and ML coordinates measured from bregma, DV coordinates from the skull, incisor bar at -3.3 mm), as previously described (58, 73). Cannulae were held in place using dental acrylic cement anchored to four stainless steel screws tapped into the frontal and parietal bones of the skull. Obturators (Plastics One, Roanoke, VA, USA) were placed in the cannulae to maintain patency. All animals were given five days to recover from surgery and for the first three days after surgery, rats were treated daily with an analgesic agent (1 mg/kg Metacam, Boehringer Ingelheim, Ingelheim am Rhein, Germany) orally administered in drinking water.

### Intra-striatal infusions

The influence of aDLS DA receptor blockade on adjunctive drinking behavior was tested at early and late stage of training for SIPw and SIPa, namely during the acquisition of SIPw (Experiment 1, SIPw session 5 onwards, **Test 1 Effect of  $\alpha$ -flu on Early SIPw**) and SIPa (Experiment 2, SIPa session 3 onwards, **Test 3, Effect of  $\alpha$ -flu on Early SIPa**) and well-established SIPw (Experiment 2, SIPw session 20 onwards, **Test 2, Effect of  $\alpha$ -flu on Late SIPw**) and SIPa (SIPa session 20 onwards, **Test 4, Effect of  $\alpha$ -flu on Late SIPa**).

Before being tested, rats were habituated to the intra-aDLS insertion of the injector. Each test was preceded by intra-aDLS infusions (0.5  $\mu$ l/side) of  $\alpha$ -flupentixol (0, 6, 12  $\mu$ g/side, made via 28-gauge steel injectors (Plastics One, Roanoke, VA, USA) lowered to the injection sites 2 mm ventral to the end of the guide cannulae. Infusions were made over 90 s using a syringe pump (Harvard Apparatus) and were followed by a 60 s period to allow diffusion of the infused drug or vehicle before injectors were removed and obturators were replaced. Test sessions began 5 min later. The effect of aDLS DA receptor blockade on adjunctive drinking was tested on rats from experiment 1 (**Test 1**) in a between subject design, and in rats from experiment 2 (**Tests 2, 3 and 4**) in a counterbalanced order following a Latin-Square design. Each infusion-day was followed by two baseline sessions.

### Histology

At the end of the experiment, rats were euthanized with an overdose of sodium pentobarbital (300 mg; Dolethal; Vétoquinol UK Ltd, Buckingham, UK) and then perfused transcardially with isotonic saline followed by 10% neutral buffered formalin. Brains were extracted and transferred to a 30% sucrose solution in 0.01 M PBS for 48 hours before being processed into 60  $\mu$ m coronal sections using a Leica CM3050 S Research Cryostat. Sections were mounted and stained with Cresyl Violet.

Cannulae placements in the aDLS were verified using a light microscope by an experimenter blind to the behavioral results.

### Data and Statistical analyses

Data are presented as means  $\pm$  SEM and individual data points or box plots [medians  $\pm$  25% (percentiles) and Min/Max as whiskers], and were analyzed with STATISTICA-10 Software (Statsoft, Inc., Tulsa, OK, USA) or Statistical Package for Social Sciences (IBM SPSS, v 26, USA). Assumption for parametric analyses, namely homogeneity of variance, sphericity and normality of distribution were verified prior to each analysis with Cochran, Mauchly and Shapiro-Wilk's tests, respectively. Where normality was substantially violated, data were Log transformed and where sphericity was violated, Greenhouse-Geisser correction was applied.

Behavioral data on acquisition or maintenance of SIPw or SIPa were analyzed using repeated measures analyses of variance (ANOVA) with either time as within-subject factor alone or time or fluid as within-subject factor and group (HD vs LD or cluster) as between-subject factor.

The effect of aDLS DA receptor blockade on adjunctive drinking was analyzed with one-way ANOVA (**Test 1**) or repeated measures ANOVA (**Test 2, 3 and 4**) with treatment as between (**Test 1**) or within-subject factor (**Tests 2-4**) and group as between-subject factor (**Tests 2-4**).

Two-step K-mean cluster analysis (58, 67) was performed to identify groups of individuals whose reliance of adjunctive drinking on aDLS DA differed across tests. Thus, fluid intake under  $\alpha$ -flupentixol treatment at Test 2 and 4 was averaged across doses and was expressed as percentage change from baseline (i.e., vehicle-treated rats); three subpopulations of rats were identified: Cluster 1 represented aDLS reliant water coper (WC) rats (n=11), Cluster 2 encompassed the marginally aDLS reliant WC rats (n=19) and Cluster 3 the aDLS reliant alcohol coper (AC) rats (n=8).

We additionally computed an index of differential reliance on aDLS DA of compulsive drinking of alcohol vs water, using the following equation:  $|(sensitivity\ to\ aDLS\ at\ late\ SIPa - sensitivity\ to\ aDLS\ at\ late\ SIPw)/sensitivity\ to\ aDLS\ at\ late\ SIPw|$ . This enabled the analysis of whether the emerging reliance on aDLS control predicts individual tendency to rely on alcohol to cope with distress and the ensuing development of compulsive alcohol drinking (54).

Rats were also ranked according to their fluid intake (mL) before receiving  $\alpha$ -flupentixol infusions (i.e., after the last three session of SIPw or SIPa) to identify individuals that increased their intake when alcohol was introduced in the SIP procedure.

The confirmation of significant main effects and differences among individual means were further analyzed using the Newman-Keuls post-hoc test, Dunnett's test (when comparing multiple time points to a single baseline) or planned comparisons, as appropriate. Significance was set at  $\alpha \leq .05$  and effect sizes are reported as partial eta squared ( $\eta_p^2$ ).

## Results

Sixty rats with cannula placements located in the aDLS were included in the final analysis (**Figure 2A**).

Exposure to the SIP procedure resulted, at the population level, in a progressive development of adjunctive drinking behavior, expressed as an increase in water intake in response to the introduction of a FT- 60 s schedule of food delivery over 5 (for **experiment 1**) or 20 sessions (for **experiment 2**) [main effect of time:  $F_{2,7,55,8}=5.46$ ,  $p=0.003$ ,  $\eta_p^2= 0.21$  and  $F_{4,4,162,4}=17.89$ ,  $p < 0.001$ ,  $\eta_p^2= 0.33$ , respectively] that became different from that expressed at baseline from session 4 and 3 onwards, respectively (**Figure 2B**).

As previously described (32, 54, 66, 74), marked individual differences in the propensity to lose control over adjunctive water drinking behavior as a coping strategy emerged over 20 SIPw sessions [main effect of group:  $F_{1,19} = 52.73$ ,  $p < 0.001$ ,  $\eta_p^2 = 0.73$ ; time:  $F_{20,380} = 16.39$ ,  $p < 0.001$ ,  $\eta_p^2 = 0.46$  and group x time interaction:  $F_{20,380} = 11.74$ ,  $p < 0.001$ ,  $\eta_p^2 = 0.38$ ] (**Figure 2B**). Thus, HD rats (upper quartile of the population, n=10) were prone readily to develop excessive levels of adjunctive water intake, eventually drinking more than 15 mL/hour ( $15.30 \pm 1.21$  mL over the last three sessions), more twice the intake of the population as a whole, and almost ten times more than LD rats (lower quartile of the population, n=11) ( $1.70 \pm 0.32$  mL over the last three sessions) [main effect of group:  $F_{1,19} = 113.19$ ,  $p < 0.001$ ,  $\eta_p^2 = 0.86$ ] (**Figure 2C**, left panel). This differential level of polydipsic water intake observed between HD and LD rats after 20 daily SIP sessions remained stable over long periods of time, as previously shown (32).

However, the introduction of the opportunity to drink alcohol instead of water as a means to cope with the distress induced by the SIP procedure resulted in an asymmetrical change in the level in adjunctive drinking displayed by LD and HD rats [main effect of time:  $F_{2,38} = 9.86$ ,  $p < 0.001$ ,  $\eta_p^2 = 0.34$ ; group:  $F_{1,19} = 39.81$ ,  $p < 0.001$ ,  $\eta_p^2 = 0.68$  and time x group interaction:  $F_{2,38} = 22.95$ ,  $p < 0.001$ ,  $\eta_p^2 = 0.55$ ] (**Figure 2C**). Thus, despite an overall decrease in total fluid intake upon the introduction of alcohol, likely reflective of its anxiolytic properties (75),



HD and LD rats initially maintained their then long established difference in the level of adjunctive drinking [HD ( $5.14 \pm 0.84$  mL/hour) vs LD ( $2.54 \pm 0.69$  mL/hour,  $p = 0.006$ ) (**Figure 2C**, middle panel). However, over the 20 sessions of SIPa some LD rats (63.6%) more than doubled their intake of alcohol, eventually reaching  $5.14 \pm 1.12$  mL per hour [LD, Early SIPa vs Late SIPa,  $p < 0.001$ ] (**Figure 2C**), thereby contributing greatly to the overall increase in alcohol intake shown at the population level [main effect of time  $F_{9,2,340} = 12.49$ ,  $p < 0.001$ ,  $\eta^2 = 0.25$ ] (**Figure 2B**) while becoming as compulsive as HD rats [Late SIPa, HD vs LD,  $p = 0.09$ ] that only increased their alcohol intake by ~50% over the same period [HD, Early SIPa vs Late SIPa,  $p < 0.02$ ] (**Figure 2C**, right panel). The sudden increase in fluid consumption shown by LD rats upon the introduction of alcohol cannot be accounted for by a simple increase in fluid intake over time since once established, polydipsic water intake remained stable over protracted periods of time (e.g., at least 40 days) [main effect of session:  $F_{40,360} = 9.49$ ,  $p < 0.001$ ,  $\eta_p^2 = 0.51$ ; from session 15, between sessions all  $p$ -values  $> 0.05$ ] (**Figure 2D**, left panel). Thus, rats exposed to the SIP procedure displayed similar level of polydipsic water intake over sessions 38-40 as over sessions 18-20 [ $F_{1,9} = 2.80$ ,  $p = 0.13$ ] (**Figure 2D**, right panel).

These results together replicate our original demonstration of individual differences in the reliance on alcohol to cope with distress, and the ensuing excessive drinking, which has been shown to predict and increased tendency to develop compulsive alcohol drinking (54). We then sought to identify the neural locus of control of such coping behavior that appears to be initially goal-directed, the goal of the response (drinking) being the alleviation of distress (14, 22, 76), but eventually becomes excessive and compulsive (74, 77, 78), a transition hypothesized here to reflect the development of maladaptive negative-reinforcement driven habits. Thus, we assessed the reliance of adjunctive fluid drinking on aDLS DA, a signature of habitual control over alcohol-related responding (79), and the compulsion to seek and drink alcohol (57, 58).

As predicted, after a short-term exposure to SIPw, prior to the development of excessive drinking behavior in vulnerable individuals, aDLS DA receptor blockade with  $\alpha$ -flupentixol (0, 6, 12 $\mu$ g/0.5 $\mu$ l/side; between-subject design) had no effect on water intake [main effect of treatment:  $F_{2,19} < 1$ ] (**Test 1, Early SIPw, Figure 3A**). However, after extended exposure to SIPw, at a time when vulnerable individuals had developed compulsive adjunctive drinking, the same aDLS DA receptor blockade (0, 6, 12 $\mu$ g/0.5 $\mu$ l/side  $\alpha$ -flupentixol; within-subject counter-balanced design) now resulted in a marked decrease in adjunctive water intake in these HD rats [**HD vs LD**: main effect of treatment:  $F_{2,38} = 4.16$ ,  $p = 0.023$ ,  $\eta_p^2 = 0.18$ ; group:  $F_{1,19} = 44.85$ ,  $p < 0.001$ ,  $\eta_p^2 = 0.70$  and treatment x group interaction:  $F_{2,38} = 2.96$ ,  $p = 0.06$ ,  $\eta_p^2 = 0.13$ ]. Follow-up analyses confirmed that aDLS DA receptor blockade did not influence drinking in LD rats [main effect of treatment:  $F_{2,20} < 1$ ], while it greatly reduced excessive adjunctive drinking in HD rats [main effect of treatment:  $F_{2,18} = 3.55$ ,  $p = 0.049$ ,  $\eta_p^2 = 0.28$ ; 0 vs 6 and 12 $\mu$ g/side:  $p = 0.007$ ] (**Test 2, Late SIPw, Figure 3B**).

In marked contrast, in the same rats, the introduction of alcohol as a means to cope with distress resulted in a disengagement, albeit transient (see below), of aDLS DA control over adjunctive drinking. Thus, intra aDLS infusions of the DA receptor antagonist  $\alpha$ -flupentixol no longer decreased fluid intake in HD rats after three days of SIPa [**analyzing HD and LD**: main effect of group:  $F_{1,19} = 4.95$ ,  $p = 0.038$ ,  $\eta_p^2 = 0.21$ , treatment:  $F_{2,38} = 1.44$ ,  $p = 0.25$  and treatment x group interaction:  $F_{2,38} < 1$ ] (**Test 3, Early SIPa, Figure 3C**), thereby demonstrating that learning to utilize alcohol to cope with distress, even in individuals that had established a compulsive adjunctive drinking behavior with water, is associated with a disengagement of habitual control over behavior.

However, following 20 daily sessions of SIPa when adjunctive alcohol drinking had escalated and become excessive, it became, once again, reliant on aDLS DA as shown by the emergence of a sensitivity of alcohol drinking to aDLS DA receptor blockade in HD rats [**analyzing HD and LD**: main effect of group:  $F_{1,19} = 1.17$ ,  $p = 0.29$  and treatment x group

interaction:  $F_{2,38} = 4.76$ ,  $p = 0.014$ ,  $\eta_p^2 = 0.20$ ; HD rats, 0 vs 12  $\mu\text{g}/\text{side}$ :  $p = 0.044$ ] (**Test 4, Late SIPa, Figure 3D**).

Building on previous evidence that the magnitude of the reliance of instrumental alcohol seeking on aDLS DA when it becomes habitual predicts the severity of the ensuing compulsive behavior in vulnerable individuals in a positive reinforcement setting (58), here we further investigated whether a similar relationship was observed between the magnitude of the reliance of adjunctive responses, maintained through negative reinforcement, on aDLS DA and the vulnerability to develop excessive, compulsive adjunctive drinking.

We capitalized on the within-subject approach on which experiment 2 was designed to determine, for each individual, the differential sensitivity of excessive adjunctive drinking of water (**Test 2**) vs alcohol (**Test 4**) to intra aDLS infusions of  $\alpha$ -flupentixol (mean % decrease of intake following DA receptor blockade relative to baseline, i.e., following vehicle infusions). A K-mean cluster analysis (57, 67) revealed three sub-populations that differed in the reliance of their excessive water or alcohol adjunctive drinking on aDLS DA (**Figure 4A**). A first cluster (Cluster 1, 28.9% of the total population) comprised individuals that had developed an aDLS-DA dependent adjunctive water drinking behavior before they switched to alcohol drinking that also became reliant on aDLS-DA. These aDLS reliant WC rats, which comprised 82% of HD and intermediate individuals, differed from rats of Cluster 2 (50% of the population; which instead comprised 84% of intermediate and LD rats) whose water drinking was marginally reliant on aDLS-DA and who did not engage their habit system when subsequently exposed to alcohol. In contrast, individuals in Cluster 3 (21.1% of the population, which comprised 87.5% of LD and intermediate rats) were the only ones to develop an adjunctive response reliant on aDLS DA when they used alcohol, as confirmed by an analysis of the ratio of sensitivity of adjunctive fluid intake to aDLS DA receptor blockade between SIPa and SIPw [main effect of cluster:  $F_{2,35} = 13.33$ ,  $p < 0.001$ ,  $\eta_p^2 = 0.43$ ; Cluster 3 vs 1 and 2,  $p < 0.001$ , respectively] (**Figure 4B**, bottom right panel). The time course of the engagement of aDLS DA in the control over adjunctive behavior of Cluster 3 rats was therefore very different to that shown by Cluster 1 rats (**Figure 4C**) [treatment x time x cluster interaction:  $F_{5,87.3} = 4.48$ ,  $p = 0.001$ ,  $\eta_p^2 = 0.20$ ; treatment x time interaction:  $F_{2,5,87.3} = 4.48$ ,  $p = 0.005$ ,  $\eta_p^2 = 0.12$ ], with profound differences in their sensitivity to aDLS DA receptor antagonism at LATE SIPw (**Test 2**) [main effect of treatment:  $F_{1,5,52.2} = 5.01$ ,  $p = 0.017$ ,  $\eta_p^2 = 0.12$ ; treatment x cluster interaction:  $F_{3,52.2} = 6.16$ ,  $p = 0.001$ ,  $\eta_p^2 = 0.26$ ] and at LATE SIPa (**Test 4**) [main effect of treatment:  $F_{1,7,60.1} = 6.49$ ,  $p = 0.004$ ,  $\eta_p^2 = 0.16$ ; treatment x cluster interaction:  $F_{3,4,60.1} = 7.55$ ,  $p < 0.001$ ,  $\eta_p^2 = 0.30$ ], but not EARLY SIPa (**Test 3**) [main effect of treatment:  $F_{2,70} = 1.22$ ,  $p = 0.30$ ; treatment x cluster interaction:  $F_{4,70} < 1$ ]. The differences at LATE SIPw were driven exclusively by Cluster 1 individuals [0 vs 6  $\mu\text{g}/\text{side}$ :  $p < 0.001$ , 0 vs 12  $\mu\text{g}/\text{side}$ :  $p < 0.001$ ] (**Figure 4C**, upper panel), whereas the effects at LATE SIPa were driven by individuals belonging to both Cluster 1 and Cluster 3 [**Cluster 1**, 0 vs 12  $\mu\text{g}/\text{side}$ :  $p = 0.001$ ; **Cluster 3**, 0 vs 12  $\mu\text{g}/\text{side}$ :  $p = 0.010$ ] (**Figure 4C**, bottom panel). Further retrospective investigation of the individuals comprised in each cluster revealed that most of those belonging to Cluster 1 were HD rats that had developed a compulsive adjunctive drinking behavior with water which then persisted when alcohol was introduced, whereas the majority of individuals in Cluster 3 instead had developed compulsive adjunctive fluid intake only upon introduction of alcohol. These individuals were actually AC that increased their polydipsic alcohol intake by 60% over the three weeks of SIPa, eventually to reach the level of intake shown early on by WC soon after the introduction of alcohol. Together these data demonstrate that the development of compulsive adjunctive drinking depends on the engagement of aDLS-DA dependent control over behavior that eventually occurred in 81.6 % of the individuals in this study.

## Discussion

At the population level, individuals in the present study developed an adaptive coping response to the distress generated by intermittent delivery of food under a SIP procedure,

expressed as non-regulatory, adjunctive polydipsic drinking behavior that remained stable over up to 42 days. However, within two weeks some individuals progressively lost control over the polydipsic drinking response and developed a compulsive coping strategy. In contrast, some individuals did not acquire a coping response with water, but only did so when they had access to alcohol. These individuals that drank alcohol to cope with distress subsequently developed compulsive coping behavior.

The results of the present study replicate previously reported individual variability in the tendency both to engage in polydipsic drinking (54) and to develop compulsive adjunctive behaviors (32, 54, 66, 68, 69, 74, 77, 78, 80), and more recent evidence that some individual rats that do not develop a coping response with water, do so readily with alcohol (54). Importantly, the results of the present study provide causal evidence of a progressive engagement of aDLS DA in the control over adjunctive behavior, especially when it becomes compulsive in vulnerable individuals. While the acquisition of polydipsic drinking, of water or alcohol was not dependent on aDLS DA, its excessive and compulsive manifestation in vulnerable individuals was selectively decreased by bilateral aDLS DA receptor blockade.

In those individuals that had not developed a coping strategy with water (so-called AC, 54) polydipsic drinking became reliant on aDLS DA only when alcohol drinking became compulsive. This engagement of aDLS DA habit system (81, 82) in the control over polydipsic alcohol drinking was specific to a facilitated transition to compulsion by the acquisition of alcohol use as a self-medication strategy. It could not be attributed to the instantiation of habitual control over behavior by protracted training (83) because (i) the individual differences observed in the tendency to develop excessive polydipsic drinking after 20 sessions of SIPw did not evolve further across an additional period of 20 sessions when animals continued to be given access to water instead of alcohol (see [Figure 2D](#) and 32), and (ii) some individuals that had not engaged aDLS DA when drinking under SIPw also did not do so when subsequently given access to alcohol ([Figure 3](#)). Finally, the emerging reliance on aDLS DA of alcohol drinking as a coping behavior cannot be explained by a difference in the level of fluid intake: while the level of compulsive fluid intake shown by HD rats at the end of the 20 sessions of SIPa was much lower than that shown at the end of the 20 sessions of SIPw, in both cases their excessive adjunctive behavior was equally sensitive to aDLS DA receptor blockade. Importantly, although they decreased the volume of fluid they drank when alcohol was introduced, HD rats still ingested 5-8 ml/hour, that is more than double the amount of alcohol consumed by the same strain of rats (1-3 ml/h) following at least 12 sessions of intermittent access to 10% alcohol in a two-bottle choice procedure (data from 54)), a time when rats had already escalated their alcohol intake. These observations reveal the excessive nature of their alcohol intake, which has previously been shown to result in blood alcohol levels higher than  $0.6 \text{ g.l}^{-1}$  (54). These results are in line with a body of evidence suggesting marked differences in the psychological and neural mechanisms underlying the acquisition of adjunctive coping responses and its subsequent compulsive manifestation in vulnerable individuals.

The psychological nature of adjunctive behaviors has long been debated since they were originally considered not to fulfil the necessary requirements of contingency with food delivery to be instrumental in that polydipsic drinking, even in the early acquisition stages, is a consequence of the intermittent delivery of food. It does not lead to the delivery of food or help to meet an homeostatic need (for review, see 76).

However, if a change in an interoceptive state, namely anxiolysis (84), is considered the outcome of the coping displacement strategies, then adjunctive polydipsic drinking, which superficially might appear to be consummatory, is in fact an instrumental response (76, 85, 86), elicited and maintained by negative reinforcement. Furthermore, the engagement in polydipsic drinking during the first week of exposure to SIP depends on the interoceptive cortex, namely the anterior insula (32) and results in a decrease in the activation of the hypothalamic-pituitary-adrenal axis provoked by intermittent food delivery (14, 15, 19-22).

Furthermore, at the same early stage of training, prevention of drinking in the SIP context results in an increase in corticosterone levels (13).

Early polydipsic water intake has features of goal-directedness in that it is sensitive to outcome devaluation (anti-anxiolysis), since there is a decrease in responding following administration of anxiogenic drugs such as CRF (87) or amphetamine (63, 88). In contrast, following prolonged exposure to SIP, the same acute amphetamine challenge no longer results in a decrease in drinking (88). These observations suggest that polydipsic drinking is initially a response tied to the motivational value of its outcome, namely anxiolysis, but that it eventually becomes habitual (89).

Development of habitual control over polydipsic drinking is consistent with a progressive shift in the striatal locus of control over behavior. Selective 6-hydroxydopamine lesions of the mesolimbic system prevent the acquisition of SIP (90-92), which is otherwise associated with a ramping of extracellular levels of DA in the nucleus accumbens core across sessions (93). In contrast, DA transporter deficient mice and rats, which have elevated levels of DA, display an impaired acquisition of polydipsic drinking (94, 95), which is also decreased in wild type animals by the acute administration of psychostimulants such as cocaine and D-amphetamine directly into the nucleus accumbens (31, 96). Together these results show that the acquisition of adjunctive drinking behavior depends on DA signalling in the mesolimbic system, but that it is impaired by an increase in tonic extracellular levels of DA. In marked contrast, when this coping behavior is well established and becomes excessive in vulnerable individuals, it is no longer impaired by similar causal manipulations of the mesolimbic DA system (63). Furthermore, repeated amphetamine exposure, which facilitates habitual responding under positive reinforcement (97), exacerbates polydipsic drinking (98) which becomes independent of food delivery (98, 99), suggesting the development of stimulus-response control over behavior (100) when it has become compulsive in vulnerable individuals. These observations are in line with the evidence that polydipsic drinking during early SIPw training is not accompanied by neuronal activation in the DLS (101), whereas its compulsive manifestation after extended exposure is associated with increased spine density in this region (64).

The apparent ventral to dorsal striatal shift in the locus of control over adjunctive behaviors when they become compulsive (102) agrees with previous evidence that the development of compulsive alcohol seeking in vulnerable individuals is predicated on the functional engagement of aDLS DA. This lends further support to the hypothesis that the development of compulsion stems from a loss of control over aDLS dependent habits (103-106). It has been recently shown in the context of cocaine addiction (70) that compulsive coping behavior may be conceptualized as the manifestation of an urge to express an ingrained habit (105, 107, 108) the performance of which actually becomes the goal of the behavior (70).

While stress shifts the balance towards aDLS-dependent habits from goal-directed behavior (109-111), it is unlikely that the individual differences in the tendency to develop compulsive polydipsic water drinking observed here and elsewhere (32, 66, 68, 69) are due to a differential sensitivity to stress. Individuals that did not acquire a coping response with water did so readily when they had access to alcohol instead. This suggests that the lack of development of an adjunctive behavior under SIPw in these individuals was not due to their lack of sensitivity to the distress engendered by the SIP procedure. Instead, these individuals needed alcohol in order to develop this coping response.

In contrast, the tendency of WC to develop a coping response with water and the subsequent loss of control over it in vulnerable individuals may reflect an interplay between a heightened sensitivity to negative urgency (112) and an inherent propensity generally to rely on the aDLS habit system. Hence, on the one hand, the development of compulsive SIP depends on both insula-dependent interoceptive mechanisms, the noradrenaline stress system and their interaction with pre-existing impulsivity (32, 66). Whereas on the other hand, it is also predicted by a pre-existing tendency to use the habit system across a wide array of tasks, from response learning in spatial navigation (113, 114) to resistance to devaluation in

instrumental reinforcement and perseverative responses in reversal learning task (101, 115). Overall, these results support the view that the inflexibility and increased responding under operant schedules that promote habitual behavior shown by HD for water rats (69, 116) arises from an interaction between an inherent tendency to rely on the habit system and its recruitment by negative reinforcement during the development of a coping response.

Using the same SIP procedure, we have previously shown that alcohol enables the development of adjunctive responses in a specific subpopulation of rats otherwise unable to cope with distress by drinking water. In these individuals, it was the acquisition of alcohol use as a self-medication strategy, and not the overall level of intoxication (AC did not differ from WC in their overall level of alcohol intake or the blood alcohol levels they reach) that determined the greater vulnerability they showed to develop compulsive, quinine resistant, alcohol drinking (54). This subpopulation of AC is very similar to that identified as Cluster 3 in the present study which only engaged aDLS DA when alcohol was introduced in the SIP procedure. The engagement of aDLS DA in these AC may be attributable to the adaptations that alcohol exposure causes in the aDLS including its disinhibition by the dampening of GABAergic transmission onto its principal medium spiny projection neurons (117, 118). Together, these observations support the view that the engagement of habitual control over negative-reinforcement driven behaviors, such as the acquisition of alcohol drinking as a self-medication strategy, is an important determinant of the vulnerability to develop compulsive drinking (52, 56, 104, 119-121).

It remains to be established why some individuals can only develop a coping response with alcohol but not water. One hypothesis is that the anxiolytic properties of alcohol facilitate the acquisition of the adjunctive response in these individuals (122, 123). This is suggested by the marked and steady decrease in total fluid intake WC show after introduction of alcohol, which is quantitatively similar to that observed following administration of benzodiazepines (124).

Importantly, the introduction of alcohol in these WC resulted in a transient disengagement of the aDLS DA-dependent habit system. This reveals that the same behavioral expression of a coping response, similar to instrumental responses for positive reinforcers, can be mediated by either the goal-directed or the habit system. But perhaps more importantly it suggests that even a well-established, negative reinforcement-based habitual coping response can undergo incentive learning (89, 125) when alcohol becomes part of it.

Together these observations provide evidence for a role of negative reinforcement-based habits in the development of compulsive coping behaviors.

## Authors contribution

DB, CG, AD, and YPO designed the experiments. CG, AD, YPO, MP and CM carried out the behavioral experiments. LMP, CG and DB performed the data analysis. LMP, CG, BJE and DB wrote the manuscript.

## References

1. O. P. John, J. J. Gross, Eds., *Handbook of Emotion Regulation* (The Guilford Press, New York, 2007).
2. D. Kobylinska, P. Kusev, Flexible Emotion Regulation: How Situational Demands and Individual Differences Influence the Effectiveness of Regulatory Strategies. *Front Psychol* **10**, 72 (2019).
3. R. S. Lazarus, S. Folkman, *Stress, appraisal, and coping* (Springer publishing company, 1984).
4. J. J. Gross, Emotion regulation: Past, present, future. *Cognition & Emotion* **13**, 551-573 (1999).
5. J. J. Gross, O. P. John, Individual differences in two emotion regulation processes: implications for affect, relationships, and well-being. *J Pers Soc Psychol* **85**, 348-362 (2003).
6. G. A. Bonanno, C. L. Burton, Regulatory Flexibility: An Individual Differences Perspective on Coping and Emotion Regulation. *Perspect Psychol Sci* **8**, 591-612 (2013).
7. C. Ray, J. Lindop, S. Gibson, The concept of coping. *Psychological Medicine* **12**, 385-395 (1982).
8. C. Mohiyeddini, S. Semple, Displacement behaviour regulates the experience of stress in men. *Stress* **16**, 163-171 (2013).
9. C. Mohiyeddini, S. Bauer, S. Semple, Public self-consciousness moderates the link between displacement behaviour and experience of stress in women. *Stress* **16**, 384-392 (2013).
10. M. M. Tugade, B. L. Fredrickson, Regulation of Positive Emotions: Emotion Regulation Strategies that Promote Resilience. *Journal of Happiness Studies* **8**, 311-333 (2007).
11. T. Mayordomo, P. Viguer, A. Sales, E. Satorres, J. C. Meléndez, Resilience and Coping as Predictors of Well-Being in Adults. *The Journal of Psychology* **150**, 809-821 (2016).
12. R. Dantzer, P. Mormede, Pituitary-adrenal consequences of adjunctive activities in pigs. *Horm Behav* **15**, 386-395 (1981).
13. A. Tazi, R. Dantzer, P. Mormede, M. Le Moal, Pituitary-adrenal correlates of schedule-induced polydipsia and wheel running in rats. *Behav Brain Res* **19**, 249-256 (1986).
14. L. P. Brett, S. Levine, Schedule-induced polydipsia suppresses pituitary-adrenal activity in rats. *J Comp Physiol Psychol* **93**, 946-956 (1979).
15. G. Mittleman, G. H. Jones, T. W. Robbins, The relationship between schedule-induced polydipsia and pituitary-adrenal activity: pharmacological and behavioral manipulations. *Behav Brain Res* **28**, 315-324 (1988).
16. J. Falk, Production of polydipsia in normal rats by an intermittent food schedule. *Science* **133**, 195-196 (1961).
17. P. R. Killeen, S. J. Hanson, S. R. Osborne, Arousal: its genesis and manifestation as response rate. *Psychol Rev* **85**, 571-581 (1978).
18. S. Levine, J. Weinberg, L. P. Brett, Inhibition of pituitary-adrenal activity as a consequence of consummatory behavior. *Psychoneuroendocrinology* **4**, 275-286 (1979).

19. M. Lopez-Grancha *et al.*, Differences in corticosterone level due to inter-food interval length: implications for schedule-induced polydipsia. *Horm Behav* **49**, 166-172 (2006).
20. R. Levine, S. Levine, Role of the pituitary-adrenal hormones in the acquisition of schedule-induced polydipsia. *Behav Neurosci* **103**, 621-637 (1989).
21. L. P. Brett, S. Levine, The pituitary-adrenal response to "minimized" schedule-induced drinking. *Physiol Behav* **26**, 153-158 (1981).
22. R. Dantzer, C. Terlouw, P. Mormede, M. Le Moal, Schedule-induced polydipsia experience decreases plasma corticosterone levels but increases plasma prolactin levels. *Physiol Behav* **43**, 275-279 (1988).
23. S. Horwood, J. Anglim, Problematic smartphone usage and subjective and psychological well-being. *Computers in Human Behavior* **97**, 44-50 (2019).
24. H. Goodwin, E. Haycraft, C. Meyer, The relationship between compulsive exercise and emotion regulation in adolescents. *British Journal of Health Psychology* **17**, 699-710 (2012).
25. S. Moritz *et al.*, More adaptive versus less maladaptive coping: What is more predictive of symptom severity? Development of a new scale to investigate coping profiles across different psychopathological syndromes. *Journal of Affective Disorders* **191**, 300-307 (2016).
26. L. M. Lawrence, B. Elphinstone, Coping associated with compulsive buying tendency. *Stress and Health* **37**, 263-271 (2021).
27. D. Belin *et al.*, Insight: New vistas into an aetiological and phenomenological role in the psychopathology of obsessive compulsive disorders. *Annales médico-psychologiques* **169**, 420 - 425 (2011).
28. M. R. Whitehead, C. Suveg, Difficulties in emotion regulation differentiate depressive and obsessive-compulsive symptoms and their co-occurrence. *Anxiety, Stress, & Coping* **29**, 507-518 (2016).
29. J. E. Crisson, F. J. Keefe, The relationship of locus of control to pain coping strategies and psychological distress in chronic pain patients. *Pain* **35**, 147-154 (1988).
30. C. F. Moore, V. Sabino, G. F. Koob, P. Cottone, Neuroscience of Compulsive Eating Behavior. *Front Neurosci* **11**, 469 (2017).
31. M. Lopez-Grancha, G. Lopez-Crespo, M. C. Sanchez-Amate, P. Flores, Individual differences in schedule-induced polydipsia and the role of gabaergic and dopaminergic systems. *Psychopharmacology (Berl)* **197**, 487-498 (2008).
32. A. Belin-Rauscent *et al.*, From impulses to maladaptive actions: the insula is a neurobiological gate for the development of compulsive behavior. *Mol Psychiatry* **21**, 491-499 (2016).
33. N. Yao, N. Nazari, H. A. Veiskarami, M. D. Griffiths, The role of healthy emotionality in the relationship between fear of COVID-19 and mental health problems: a cross-sectional study. *Cogn Process* 10.1007/s10339-022-01101-5 (2022).
34. C. E. Waugh, C. J. Leslie-Miller, V. T. Cole, Coping with COVID-19: the efficacy of disengagement for coping with the chronic stress of a pandemic. *Anxiety Stress Coping* 10.1080/10615806.2022.2081841, 1-15 (2022).
35. S. L. Koole, K. Rothermund, Coping with COVID-19: Insights from cognition and emotion research. *Cogn Emot* **36**, 1-8 (2022).
36. P. Dimanova, R. Borbas, C. B. Schnider, L. V. Fehlbaum, N. M. Raschle, Prefrontal Cortical Thickness, Emotion Regulation Strategy use and Covid-19 Mental Health. *Soc Cogn Affect Neurosci* 10.1093/scan/nsac018 (2022).

37. R. Stanton *et al.*, Depression, Anxiety and Stress during COVID-19: Associations with Changes in Physical Activity, Sleep, Tobacco and Alcohol Use in Australian Adults. *Int J Environ Res Public Health* **17** (2020).
38. R. Ramalho, Alcohol consumption and alcohol-related problems during the COVID-19 pandemic: a narrative review. *Australas Psychiatry* 10.1177/1039856220943024, 1039856220943024 (2020).
39. E. Neill *et al.*, Alcohol use in Australia during the early days of the COVID-19 pandemic: Initial results from the COLLATE project. *Psychiatry Clin Neurosci* 10.1111/pcn.13099 (2020).
40. M. J. Dubey *et al.*, COVID-19 and addiction. *Diabetes Metab Syndr* **14**, 817-823 (2020).
41. M. K. Holton, A. E. Barry, J. D. Chaney, Employee stress management: An examination of adaptive and maladaptive coping strategies on employee health. *Work* **53**, 299-305 (2016).
42. S. Tartaglia, E. Bergagna, Alcohol consumption as a maladaptive coping strategy to face low life satisfaction. *Drugs: Education, Prevention and Policy* **27**, 306-311 (2020).
43. E. J. Khantzian, The self-medication hypothesis of addictive disorders: focus on heroin and cocaine dependence. *Am J Psychiatry* **142**, 1259-1264 (1985).
44. M. L. Cooper, M. R. Frone, M. Russell, P. Mudar, Drinking to regulate positive and negative emotions: a motivational model of alcohol use. *J Pers Soc Psychol* **69**, 990-1005 (1995).
45. D. M. Tice, E. Bratslavsky, R. F. Baumeister, Emotional distress regulation takes precedence over impulse control: If you feel bad, do it! *Journal of Personality and Social Psychology* **80**, 53-67 (2001).
46. N. H. Weiss, K. W. Bold, T. P. Sullivan, S. Armeli, H. Tennen, Testing bidirectional associations among emotion regulation strategies and substance use: a daily diary study. *Addiction* **112**, 695-704 (2017).
47. M. Cavicchioli, A. Kraslavski, M. Movalli, C. Maffei, A. Ogliari, The investigation of mechanisms underlying addictive behaviors: a case-control study. *Journal of Addictive Diseases* 10.1080/10550887.2021.1989250, 1-20 (2021).
48. C. E. Blevins, A. M. Abrantes, R. S. Stephens, Motivational pathways from antecedents of alcohol use to consequences: a structural model of using alcohol to cope with negative affect. *The American Journal of Drug and Alcohol Abuse* **42**, 395-403 (2016).
49. M. Zeidner, D. Saklofske, "Adaptive and maladaptive coping" in Handbook of coping: Theory, research, applications. (John Wiley & Sons, Oxford, England, 1996), pp. 505-531.
50. A. Ramachandran *et al.*, Alcohol use among conflict-affected persons in Ukraine: risk factors, coping and access to mental health services. *European Journal of Public Health* **29**, 1141-1146 (2019).
51. J. M. Clay, M. O. Parker, Alcohol use and misuse during the COVID-19 pandemic: a potential public health crisis? *Lancet Public Health* **5**, e259 (2020).
52. G. F. Koob, P. Powell, A. White, Addiction as a Coping Response: Hyperkatifeia, Deaths of Despair, and COVID-19. *Am J Psychiatry* **177**, 1031-1037 (2020).
53. R. Spanagel, H. R. Noori, M. Heilig, Stress and alcohol interactions: animal studies and clinical significance. *Trends Neurosci* **37**, 219-227 (2014).



54. M. Fouyssac *et al.*, Environment-dependent behavioral traits and experiential factors shape addiction vulnerability. *Eur J Neurosci* **53**, 1794-1808 (2021).
55. J. M. Clay, M. O. Parker, The role of stress-reactivity, stress-recovery and risky decision-making in psychosocial stress-induced alcohol consumption in social drinkers. *Psychopharmacology (Berl)* **235**, 3243-3257 (2018).
56. E. J. Khantzian, Addiction as a self-regulation disorder and the role of self-medication. *Addiction* **108**, 668-669 (2013).
57. C. Giuliano, M. Puaud, R. N. Cardinal, D. Belin, B. J. Everitt, Individual differences in the engagement of habitual control over alcohol seeking predict the development of compulsive alcohol seeking and drinking. *Addict Biol* **26**, e13041 (2021).
58. C. Giuliano, D. Belin, B. J. Everitt, Compulsive Alcohol Seeking Results from a Failure to Disengage Dorsolateral Striatal Control over Behavior. *J Neurosci* **39**, 1744-1754 (2019).
59. D. M. Lipton, B. J. Gonzales, A. Citri, Dorsal Striatal Circuits for Habits, Compulsions and Addictions. *Front Syst Neurosci* **13**, 28 (2019).
60. T. K. Li *et al.*, Alcohol reinforcement and voluntary ethanol consumption. *Alcohol Clin Exp Res* **25**, 117S-126S (2001).
61. S. Vollstadt-Klein *et al.*, Initial, habitual and compulsive alcohol use is characterized by a shift of cue processing from ventral to dorsal striatum. *Addiction* **105**, 1741-1749 (2010).
62. T. W. Robbins, G. F. Koob, Selective disruption of displacement behaviour by lesions of the mesolimbic dopamine system. *Nature* **285**, 409-412 (1980).
63. T. W. Robbins, D. C. Roberts, G. F. Koob, Effects of d-amphetamine and apomorphine upon operant behavior and schedule-induced licking in rats with 6-hydroxydopamine-induced lesions of the nucleus accumbens. *J Pharmacol Exp Ther* **224**, 662-673 (1983).
64. J. Ibias *et al.*, Schedule-induced polydipsia is associated with increased spine density in dorsolateral striatum neurons. *Neuroscience* **300**, 238-245 (2015).
65. J. E. Murray, D. Belin, B. J. Everitt, Double dissociation of the dorsomedial and dorsolateral striatal control over the acquisition and performance of cocaine seeking. *Neuropsychopharmacology* **37**, 2456-2466 (2012).
66. S. Ansquer *et al.*, Atomoxetine decreases vulnerability to develop compulsivity in high impulsive rats. *Biol Psychiatry* **75**, 825-832 (2014).
67. L. Marti-Prats *et al.*, Baclofen decreases compulsive alcohol drinking in rats characterized by reduced levels of GAT-3 in the central amygdala. *Addict Biol* 10.1111/adb.13011, e13011 (2021).
68. R. Pellon *et al.*, Individual differences in schedule-induced polydipsia: neuroanatomical dopamine divergences. *Behav Brain Res* **217**, 195-201 (2011).
69. M. Moreno *et al.*, Poor inhibitory control and neurochemical differences in high compulsive drinker rats selected by schedule-induced polydipsia. *Psychopharmacology (Berl)* **219**, 661-672 (2012).
70. M. Fouyssac *et al.*, Negative Urgency Exacerbates Relapse to Cocaine Seeking After Abstinence. *Biol Psychiatry* **91**, 1051-1060 (2022).
71. R. Hodebourg *et al.*, Heroin seeking becomes dependent on dorsal striatal dopaminergic mechanisms and can be decreased by N-acetylcysteine. *Eur J Neurosci* **50**, 2036-2044 (2019).

72. J. E. Murray *et al.*, Basolateral and central amygdala differentially recruit and maintain dorsolateral striatum-dependent cocaine-seeking habits. *Nat Commun* **6**, 10088 (2015).
73. G. Paxinos, C. Watson, *The rat brain in stereotaxic coordinates*, 7th ed (Elsevier Academic Press, San Diego, ed. 7th, 2013).
74. M. Moreno, P. Flores, Schedule-induced polydipsia as a model of compulsive behavior: neuropharmacological and neuroendocrine bases. *Psychopharmacology (Berl)* **219**, 647-659 (2012).
75. P. D. Suzdak, S. M. Paul, Ethanol stimulates GABA receptor-mediated Cl<sup>-</sup> ion flux in vitro: possible relationship to the anxiolytic and intoxicating actions of alcohol. *Psychopharmacol Bull* **23**, 445-451 (1987).
76. P. R. Killeen, R. Pellon, Adjunctive behaviors are operants. *Learn Behav* **41**, 1-24 (2013).
77. B. Platt, C. E. Beyer, L. E. Schechter, S. Rosenzweig-Lipson, Schedule-induced polydipsia: a rat model of obsessive-compulsive disorder. *Curr Protoc Neurosci Chapter 9*, Unit 9 27 (2008).
78. A. Woods *et al.*, Selective serotonin re-uptake inhibitors decrease schedule-induced polydipsia in rats: a potential model for obsessive compulsive disorder. *Psychopharmacology (Berl)* **112**, 195-198 (1993).
79. L. H. Corbit, H. Nie, P. H. Janak, Habitual alcohol seeking: time course and the contribution of subregions of the dorsal striatum. *Biol Psychiatry* **72**, 389-395 (2012).
80. J. Ibias, R. Pellon, Schedule-induced polydipsia in the spontaneously hypertensive rat and its relation to impulsive behaviour. *Behav Brain Res* **223**, 58-69 (2011).
81. H. H. Yin, B. J. Knowlton, The role of the basal ganglia in habit formation. *Nat Rev Neurosci* **7**, 464-476 (2006).
82. H. H. Yin, B. J. Knowlton, B. W. Balleine, Lesions of dorsolateral striatum preserve outcome expectancy but disrupt habit formation in instrumental learning. *Eur J Neurosci* **19**, 181-189 (2004).
83. A. Dickinson, Actions and Habits: The Development of Behavioural Autonomy. *Philosophical Transactions of the Royal Society of London B* **308**, 67-78 (1985).
84. L. Ahmadi, M. B. Goldman, Primary polydipsia: Update. *Best Pract Res Clin Endocrinol Metab* **34**, 101469 (2020).
85. J. Ibias, R. Pellon, F. Sanabria, A microstructural analysis of schedule-induced polydipsia reveals incentive-induced hyperactivity in an animal model of ADHD. *Behav Brain Res* **278**, 417-423 (2015).
86. B. Alvarez, J. Ibias, R. Pellon, Reinforcement of schedule-induced drinking in rats by lick-contingent shortening of food delivery. *Learn Behav* **44**, 329-339 (2016).
87. B. J. Cole, G. F. Koob, Corticotropin-releasing factor and schedule-induced polydipsia. *Pharmacol Biochem Behav* **47**, 393-398 (1994).
88. Y. P. Liu *et al.*, Effects of amphetamine on schedule-induced polydipsia. *Chin J Physiol* **48**, 176-186 (2005).
89. A. Dickinson, G. R. Dawson, Incentive learning and the motivational control of instrumental performance. *The Quarterly Journal of Experimental Psychology* **41**, 99-112 (1989).
90. G. Mittleman, I. Q. Whishaw, G. H. Jones, M. Koch, T. W. Robbins, Cortical, hippocampal, and striatal mediation of schedule-induced behaviors. *Behav Neurosci* **104**, 399-409 (1990).

91. M. Wallace, G. Singer, J. Finlay, S. Gibson, The effect of 6-OHDA lesions of the nucleus accumbens septum on schedule-induced drinking, wheelrunning and corticosterone levels in the rat. *Pharmacol Biochem Behav* **18**, 129-136 (1983).
92. G. F. Koob, S. J. Riley, S. C. Smith, T. W. Robbins, Effects of 6-hydroxydopamine lesions of the nucleus accumbens septi and olfactory tubercle on feeding, locomotor activity, and amphetamine anorexia in the rat. *J Comp Physiol Psychol* **92**, 917-927 (1978).
93. R. Weissenborn, C. D. Blaha, P. Winn, A. G. Phillips, Schedule-induced polydipsia and the nucleus accumbens: electrochemical measurements of dopamine efflux and effects of excitotoxic lesions in the core. *Behav Brain Res* **75**, 147-158 (1996).
94. G. Mittleman *et al.*, Dopamine dynamics associated with, and resulting from, schedule-induced alcohol self-administration: analyses in dopamine transporter knockout mice. *Alcohol* **45**, 325-339 (2011).
95. D. Leo *et al.*, Pronounced Hyperactivity, Cognitive Dysfunctions, and BDNF Dysregulation in Dopamine Transporter Knock-out Rats. *Journal of Neuroscience* **38**, 1959-1972 (2018).
96. G. H. Jones, M. S. Hooks, J. L. Juncos, J. B. Justice, Jr., Effects of cocaine microinjections into the nucleus accumbens and medial prefrontal cortex on schedule-induced behaviour: comparison with systemic cocaine administration. *Psychopharmacology (Berl)* **115**, 375-382 (1994).
97. A. Nelson, S. Killcross, Amphetamine exposure enhances habit formation. *J Neurosci* **26**, 3805-3812 (2006).
98. E. R. Hawken, R. J. Beninger, The amphetamine sensitization model of schizophrenia symptoms and its effect on schedule-induced polydipsia in the rat. *Psychopharmacology (Berl)* **231**, 2001-2008 (2014).
99. R. M. Murray, J. Lappin, M. Di Forti, Schizophrenia: from developmental deviance to dopamine dysregulation. *Eur Neuropsychopharmacol* **18 Suppl 3**, S129-134 (2008).
100. T. W. Robbins, R. M. Costa, Habits. *Curr Biol* **27**, R1200-R1206 (2017).
101. J. G. Gregory, E. R. Hawken, T. J. Banasikowski, E. C. Dumont, R. J. Beninger, A response strategy predicts acquisition of schedule-induced polydipsia in rats. *Prog Neuropsychopharmacol Biol Psychiatry* **61**, 37-43 (2015).
102. A. Merchan *et al.*, Excessive habit formation in schedule-induced polydipsia: Microstructural analysis of licking among rat strains and involvement of the orbitofrontal cortex. *Genes Brain Behav* **18**, e12489 (2019).
103. S. R. Chamberlain, A. D. Blackwell, N. A. Fineberg, T. W. Robbins, B. J. Sahakian, The neuropsychology of obsessive compulsive disorder: the importance of failures in cognitive and behavioural inhibition as candidate endophenotypic markers. *Neurosci Biobehav Rev* **29**, 399-419 (2005).
104. B. J. Everitt, T. W. Robbins, Neural systems of reinforcement for drug addiction: from actions to habits to compulsion. *Nat Neurosci* **8**, 1481-1489 (2005).
105. C. M. Gillan *et al.*, Enhanced avoidance habits in obsessive-compulsive disorder. *Biol Psychiatry* **75**, 631-638 (2014).
106. V. Voon *et al.*, Disorders of compulsivity: a common bias towards learning habits. *Mol Psychiatry* **20**, 345-352 (2015).
107. C. M. Gillan, T. W. Robbins, Goal-directed learning and obsessive-compulsive disorder. *Philos Trans R Soc Lond B Biol Sci* **369** (2014).
108. A. M. Graybiel, S. L. Rauch, Toward a neurobiology of obsessive-compulsive disorder. *Neuron* **28**, 343-347 (2000).

109. L. Schwabe, O. T. Wolf, Stress prompts habit behavior in humans. *J Neurosci* **29**, 7191-7198 (2009).
110. T. Smeets, P. van Ruitenbeek, B. Hartogsveld, C. Quaedflieg, Stress-induced reliance on habitual behavior is moderated by cortisol reactivity. *Brain Cogn* **133**, 60-71 (2019).
111. E. Dias-Ferreira *et al.*, Chronic stress causes frontostriatal reorganization and affects decision-making. *Science* **325**, 621-625 (2009).
112. E. P. Zorrilla, G. F. Koob, Impulsivity Derived From the Dark Side: Neurocircuits That Contribute to Negative Urgency. *Front Behav Neurosci* **13**, 136 (2019).
113. M. G. Packard, J. Goodman, Factors that influence the relative use of multiple memory systems. *Hippocampus* **23**, 1044-1052 (2013).
114. M. G. Packard, Anxiety, cognition, and habit: a multiple memory systems perspective. *Brain Res* **1293**, 121-128 (2009).
115. A. Merchan *et al.*, Behavioral and biological markers for predicting compulsive-like drinking in schedule-induced polydipsia. *Prog Neuropsychopharmacol Biol Psychiatry* **93**, 149-160 (2019).
116. S. V. Navarro *et al.*, Behavioral Biomarkers of Schizophrenia in High Drinker Rats: A Potential Endophenotype of Compulsive Neuropsychiatric Disorders. *Schizophr Bull* **43**, 778-787 (2017).
117. M. H. Patton, B. M. Roberts, D. M. Lovinger, B. N. Mathur, Ethanol Disinhibits Dorsolateral Striatal Medium Spiny Neurons Through Activation of A Presynaptic Delta Opioid Receptor. *Neuropsychopharmacology* **41**, 1831-1840 (2016).
118. M. V. Wilcox *et al.*, Repeated binge-like ethanol drinking alters ethanol drinking patterns and depresses striatal GABAergic transmission. *Neuropsychopharmacology* **39**, 579-594 (2014).
119. G. F. Koob, Negative reinforcement in drug addiction: the darkness within. *Curr Opin Neurobiol* **23**, 559-563 (2013).
120. D. Belin, A. Belin-Rauscent, J. E. Murray, B. J. Everitt, Addiction: failure of control over maladaptive incentive habits. *Curr Opin Neurobiol* **23**, 564-572 (2013).
121. D. Belin, D. Economidou, Y. Pelloux, B. J. Everitt, Habit Formation and Compulsion. *Animal Models of Drug Addiction* **53**, 337-378 (2011).
122. R. Spanagel *et al.*, Anxiety: a potential predictor of vulnerability to the initiation of ethanol self-administration in rats. *Psychopharmacology (Berl)* **122**, 369-373 (1995).
123. D. T. George, D. J. Nutt, B. A. Dwyer, M. Linnoila, Alcoholism and panic disorder: is the comorbidity more than coincidence? *Acta Psychiatr Scand* **81**, 97-107 (1990).
124. R. Pellon, A. Ruiz, E. Lamas, C. Rodriguez, Pharmacological analysis of the effects of benzodiazepines on punished schedule-induced polydipsia in rats. *Behav Pharmacol* **18**, 81-87 (2007).
125. B. Balleine, Instrumental performance following a shift in primary motivation depends on incentive learning. *J Exp Psychol Anim Behav Process* **18**, 236-250 (1992).

## Figure Legends

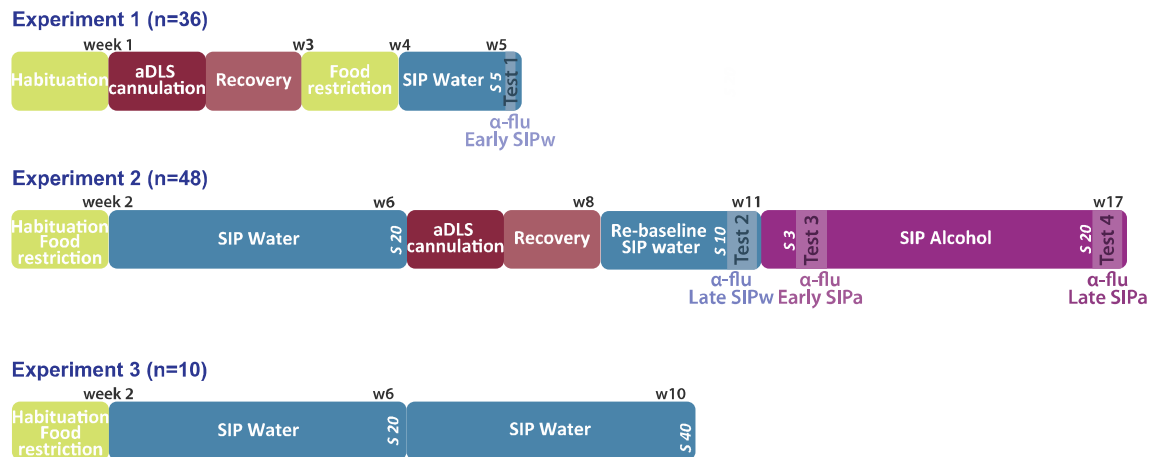

**Figure 1: Timeline of the experiments.**

Timeline of the three experiments carried-out on independent cohorts of male Sprague Dawley rats. **Experiment 1:** Following a week of habituation to the animal facility, thirty-six rats received bilateral cannulation of their anterior dorsolateral striatum (aDLS). A week later, rats were food restricted to 85% of their theoretical free-feeding weight and trained in a schedule-induced polydipsia (SIP) procedure with water (SIPw). The reliance of the acquisition of adjunctive water drinking on aDLS dopaminergic mechanisms was assessed after 5 SIPw sessions as the sensitivity of drinking behavior to bilateral infusion of the dopamine (DA) receptor antagonist  $\alpha$ -flupentixol ( $\alpha$ -flu, 0, 6, 12  $\mu$ g/side, between-subject design) into the aDLS (**Test 1,  $\alpha$ -flu Early SIPw**). **Experiment 2:** Following a week of habituation to the animal facility, forty-eight rats were food restricted for a week before being trained in the SIP procedure with water for 20 sessions, e.g., until the establishment of aberrant levels of water intake in vulnerable individuals. Then, rats were implanted with bilateral cannulas targeting the aDLS and, after at least a week, they were re-baselined under SIPw for 10 sessions. Then, the reliance of well-established, compulsive, adjunctive water drinking behavior on aDLS DA was assessed as the sensitivity of water drinking behavior to bilateral infusion of  $\alpha$ -flupentixol (0, 6, 12  $\mu$ g/side, within-subject design) into the aDLS (**Test 2,  $\alpha$ -flu Late SIPw**). Subsequently, water was replaced by 10% alcohol (SIPa) and the reliance of early and well-established adjunctive alcohol drinking on aDLS DA was measured after 3 (**Test 3,  $\alpha$ -flu Early SIPa**) or 20 (**Test 4,  $\alpha$ -flu Late SIPa**) SIPa sessions, respectively. **Experiment 3:** In order to test the stability of water intake levels once adjunctive water drinking has been established, ten rats were food restricted after a week of habituation to the colony, and then trained in the SIP procedure for 40 sessions, a period of training similar to that used in experiment 2, but with water as the only available solution throughout. W, week; s, session.

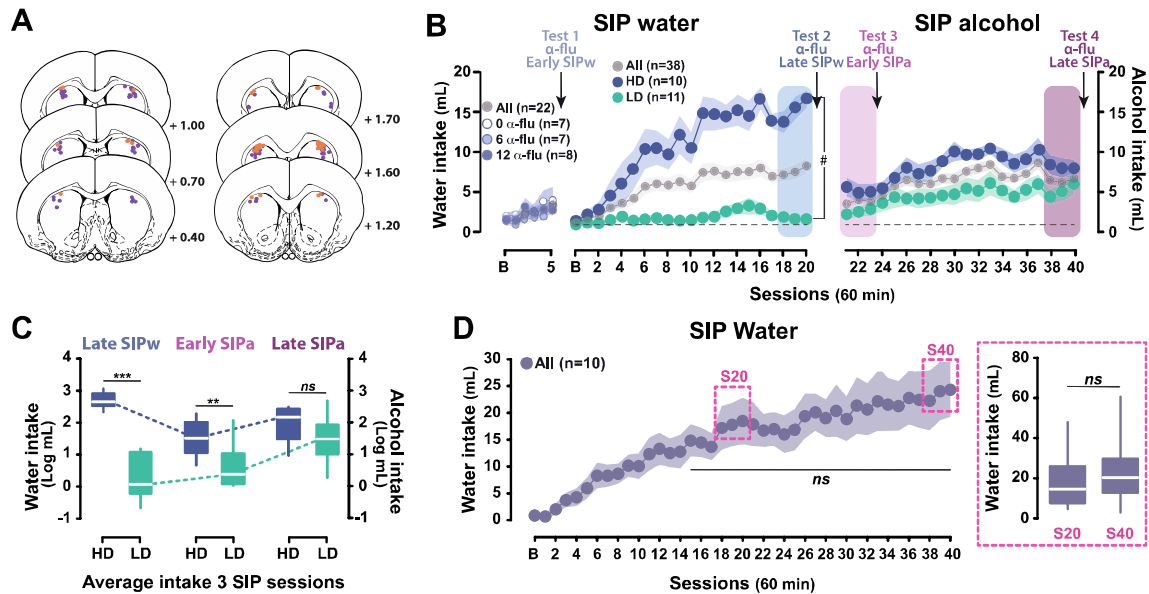

**Figure 2: Individual differences in the tendency to develop compulsive adjunctive behaviors in rat.**

**A)** Rats having completed experiments 1 and 2 with cannula tips (orange and violet for experiment 1 and 2, respectively) located in the anterior dorsolateral striatum (aDLS) according to the rat brain atlas (73) as assessed following staining with Cresyl Violet were included in the final analyses. **B-C)** At the population level, and similarly across each independent group for experiment 1, food restricted rats exposed to intermittent food delivery progressively developed adjunctive polydipsic water drinking over five (Experiment 1,  $n=22$ ) and twenty (Experiment 2,  $n=38$ ) sessions. Experiment was designed to reveal marked individual differences in the tendency to engage in polydipsic water drinking that emerged early on in training. While at the population level individuals developed a polydipsic water drinking response, some individuals, developed an excessive, compulsive polydipsic behavior while others did not engage in a displacement strategy whatsoever. Thus, high drinker (HD) and low drinker rats (LD), selected respectively in the upper and lower quartiles of the population stratified on the average water consumption over the last 3 sessions of SIP with water (Late SIPw, blue rectangle), greatly differed in their trajectory of polydipsic water drinking. HD rats developed a compulsive water drinking behavior that reached more than  $16.65 \pm 1.08$  ml/hour by the last session, or two times more than the whole population, whereas LD rats maintained throughout a water drinking behavior similar to that associated with their homeostatic need displayed at baseline (B). The introduction of alcohol resulted in significant changes in coping behavior. Thus, HD and LD rats still differed in their level of adjunctive drinking at the beginning of the SIP training with alcohol (Early SIPa, light purple rectangle), mostly due to the fact that HD rats, who had developed an excessive polydipsic drinking behavior with water persisted following the introduction of alcohol, albeit to a lower level. However, while HD rats maintained overall a steady level of polydipsic alcohol drinking over time, LD rats acquired a coping response with alcohol and eventually developed compulsive polydipsic alcohol drinking so that they no longer differed from HD rats by the end of training (Late SIPa, dark purple rectangle). **D)** This increase in alcohol drinking shown by LD rats was not attributable to an increase in fluid intake over time since once adjunctive drinking was established in an independent cohort of rats over 20 sessions (Experiment 3,  $n=10$ ), polydipsic water drinking remained stable so that by session 40 (**S40** dashed-line rectangle, average of sessions 38-40) rats displayed a similar level of fluid intake as they did by the end of the first 20 session period (**S20** dashed-line rectangle, average of sessions 18-20).

The reliance of early (Tests 1 and 3) and well-established (Tests 2 and 4) polydipsic water or alcohol drinking on aDLS DA was assessed at each time point identified by an arrow. #  $p < 0.001$  group x time interaction, \*\*\*  $p < 0.001$ , \*\*  $p < 0.01$ , HD different from LD rats, ns: no significant.

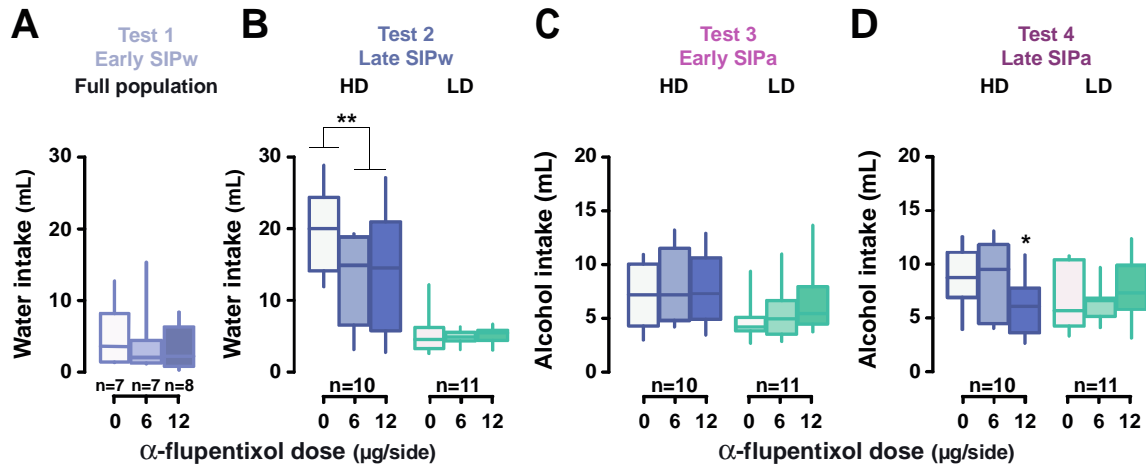

**Figure 3: Excessive, but not early, adjunctive drinking is dependent on anterior dorsolateral striatum dopamine-dependent mechanisms.**

Intra-anterior dorsolateral striatum (aDLS) infusion of the dopamine receptor antagonist  $\alpha$ -flupentixol (0, 6, 12  $\mu$ g/side) had no effect on recently acquired polydipsic water intake (Test 1, **A**) or on drinking shown by low drinker (LD) rats even after 20 sessions (Test 2, **B**). In contrast, similar intra aDLS infusions of  $\alpha$ -flupentixol (0, 6, 12  $\mu$ g/side) decreased excessive water intake in high drinkers (HD) rats (Test 2, **B**). When water was replaced by alcohol, intra aDLS dopamine receptor blockage no longer influenced polydipsic drinking in HD rats while it remained ineffective in LD rats (Test 3, **C**). In marked contrast, the sensitivity shown by HD rats to intra aDLS dopamine receptor blockade when engaged in excessive polydipsic water intake re-emerged when their polydipsic alcohol intake became well established (Test 4, **D**). \*\*  $p < 0.01$ , \*  $p < 0.05$  different from vehicle (0  $\mu$ g/side). SIPw: SIP with water; SIPa: SIP with alcohol.

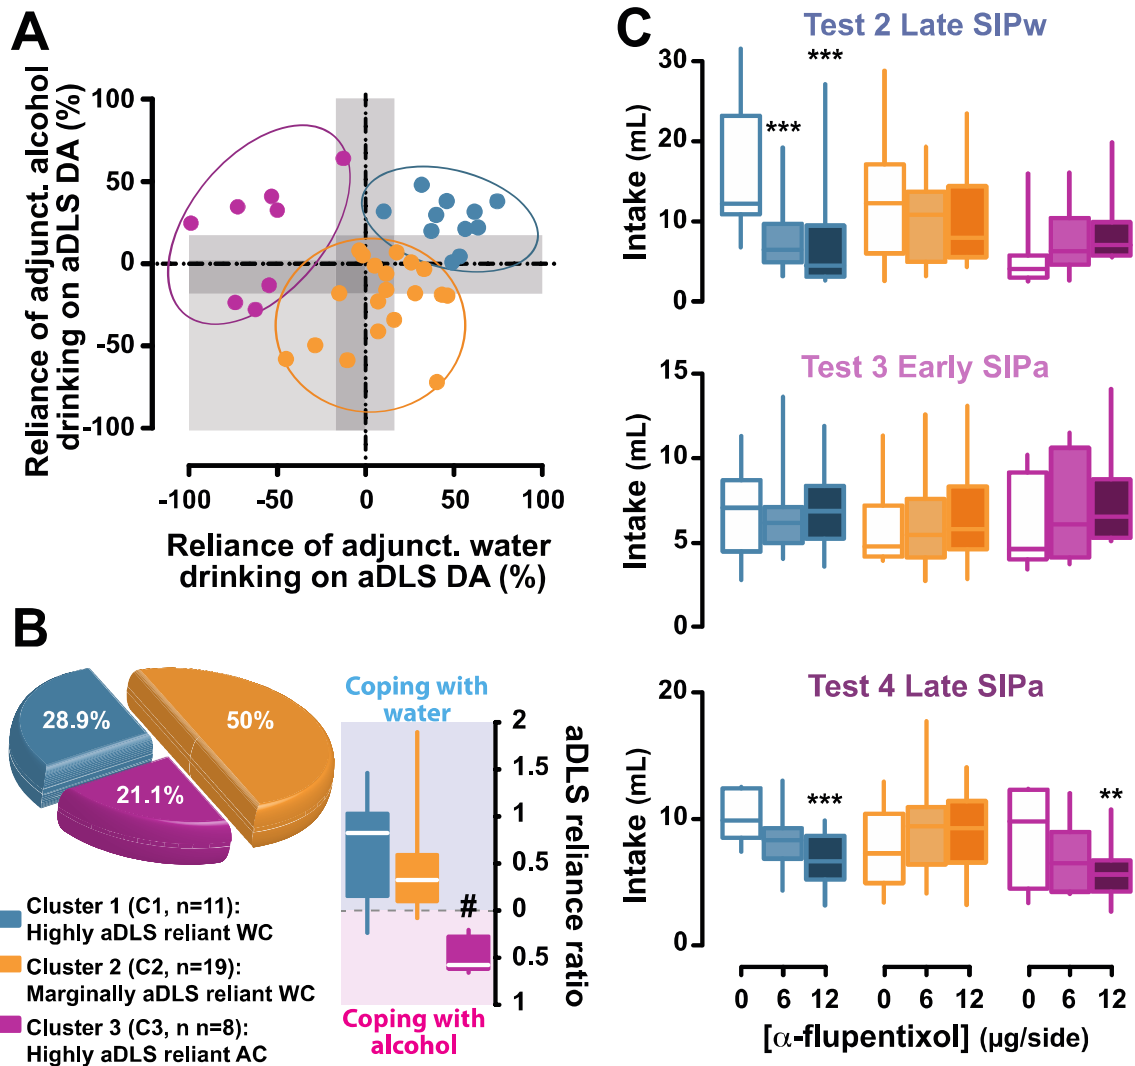

**Figure 4: The individual tendency to develop anterior dorsolateral striatum dopamine-dependent-coping response is associated with the vulnerability to develop compulsive adjunctive behavior.**

**A-B)** Marked individual differences in the reliance of compulsive drinking on anterior dorsolateral striatum (aDLS) dopamine (DA) were revealed when normalizing the influence of aDLS DA receptor blockade on polydipsic water (Late SIP water) or alcohol intake (Late SIP alcohol) to the baseline levels of drinking following vehicle infusions (0  $\mu$ g/side). A cluster analysis identified three subpopulations of rats, one (Cluster 1) comprised individuals whose polydipsic behavior, irrespective of the fluid drank, was heavily reliant on aDLS DA. These highly aDLS reliant water copers (WC) represented 28.9% of the overall population and consisted predominantly (82%) of high drinkers (HD) and intermediate individuals. A second cluster (Cluster 2) comprised individuals whose polydipsic water or alcohol drinking behavior was overall marginally sensitive to aDLS DA receptor blockade. These marginally aDLS reliant WC represented 50% of the population and consisted predominantly (84%) of low drinkers (LD) and intermediate rats. The third cluster (Cluster 3) comprised individuals whose polydipsic alcohol drinking was much more reliant on aDLS DA than their polydipsic water drinking behavior. These highly aDLS reliant alcohol copers (AC) represented 21% of the population and consisted predominantly (87.5%) of LD and intermediate rats. A systematic analysis of the respective reliance of polydipsic water vs alcohol drinking behavior on aDLS DA confirmed that only highly aDLS reliant AC displayed a selective increased in the



engagement of aDLS DA-dependent control over behavior when they used alcohol as a mean to cope with distress. **C)** Marked differences were observed in the time course of the engagement of the aDLS-DA dependent habit system in mediating compulsive coping behavior in the individuals of these three groups that map perfectly those observed on HD and LD rats (Figure 3), in that rats from cluster 1 showed sensitivity to aDLS DA receptor blockade when SIPw (Test 2 Late SIPw) and SIPa (Test 4 Late SIPa) were well-established whereas rats from cluster 3 showed such sensitivity only when SIPa was well-established, neither showing reliance on aDLS DA during the acquisition of SIPa. Rats from the heterogenous cluster 2 never showed a decrease in adjunctive drinking following aDLS that reached statistical significance throughout the training history. \*\*\*  $p \leq 0.001$ , \*\*  $p \leq 0.01$ , compared with the vehicle treatment (0  $\mu\text{g}/\text{side}$ ); #  $p < 0.001$  compared with cluster 1 and 2.

## Experiment 1 (n=36)

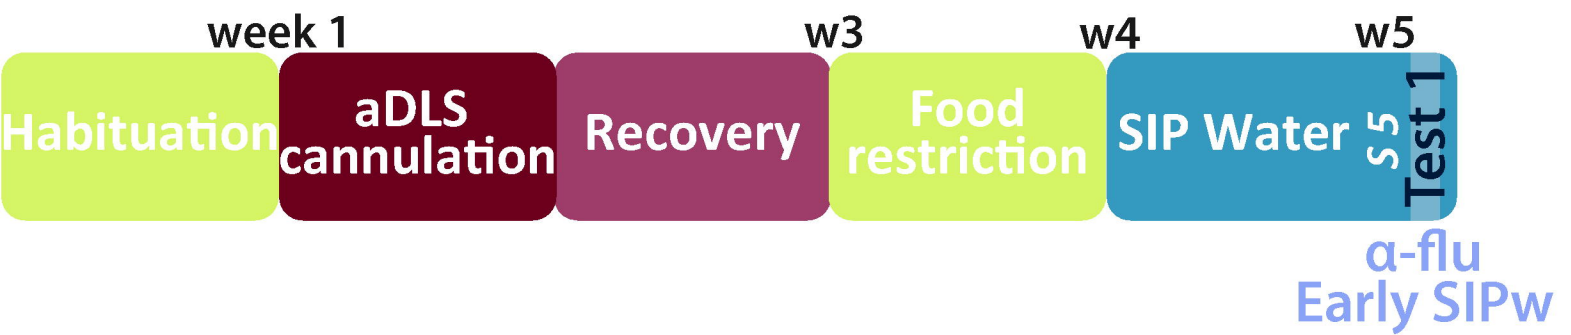

## Experiment 2 (n=48)

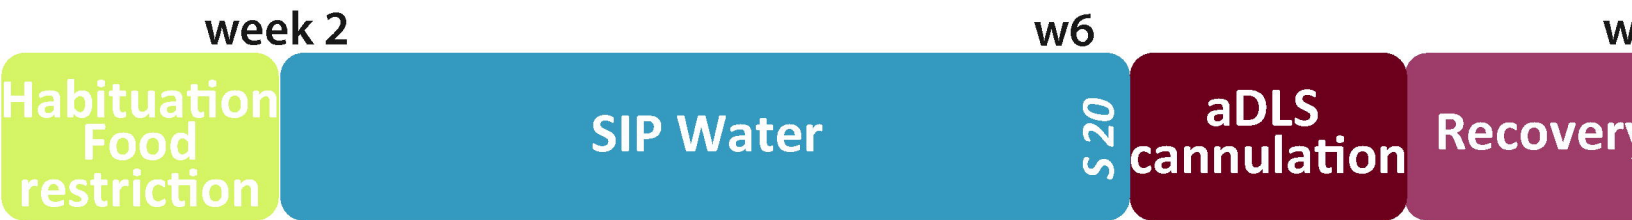

## Experiment 3 (n=10)

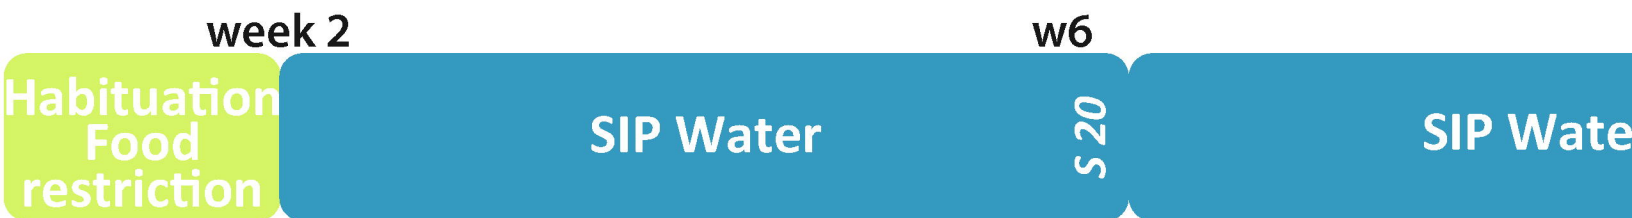

**A**

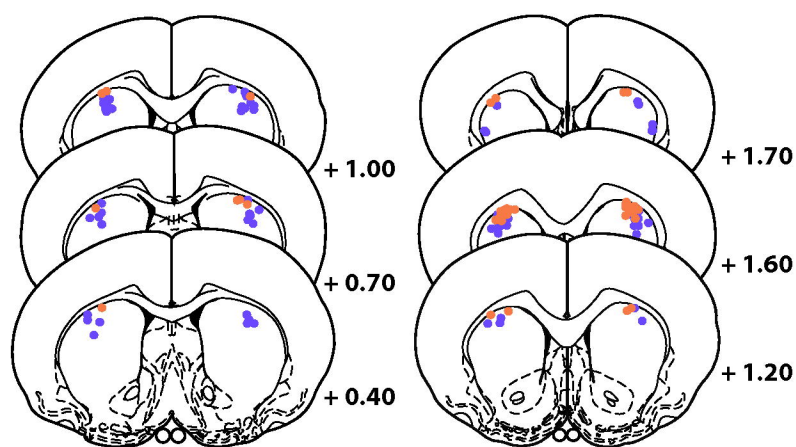

**B**

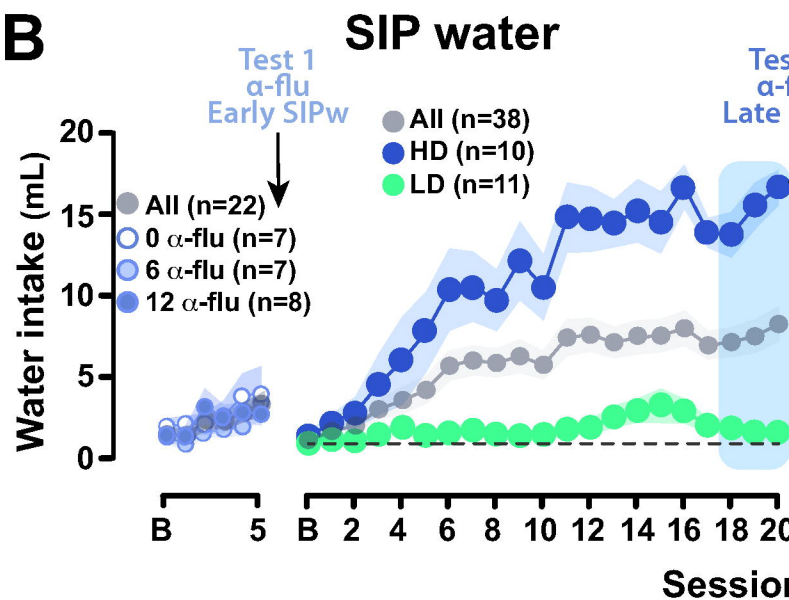

**C**

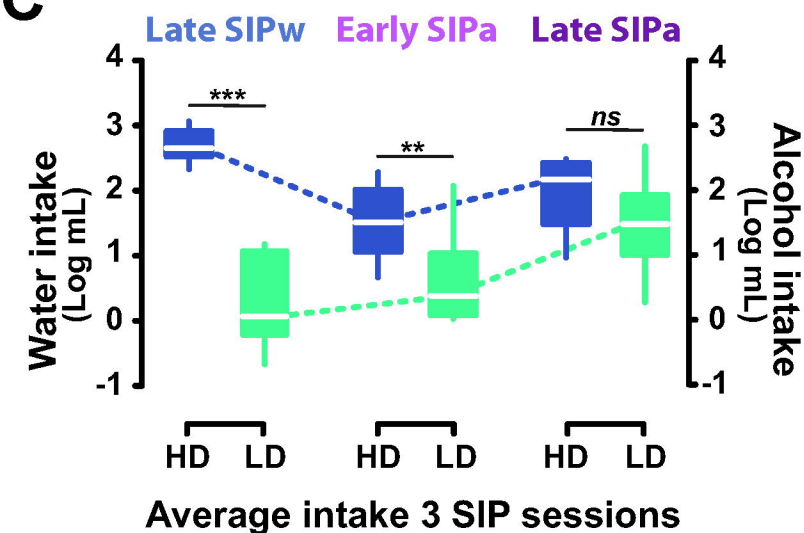

**D**

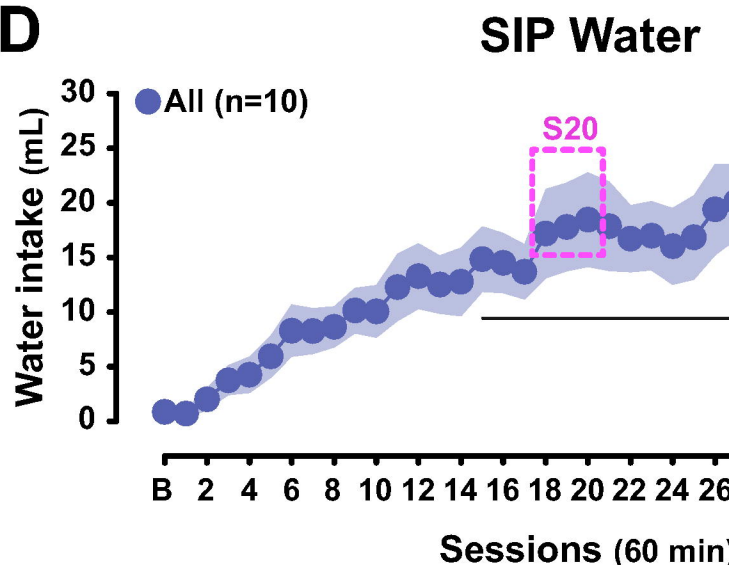

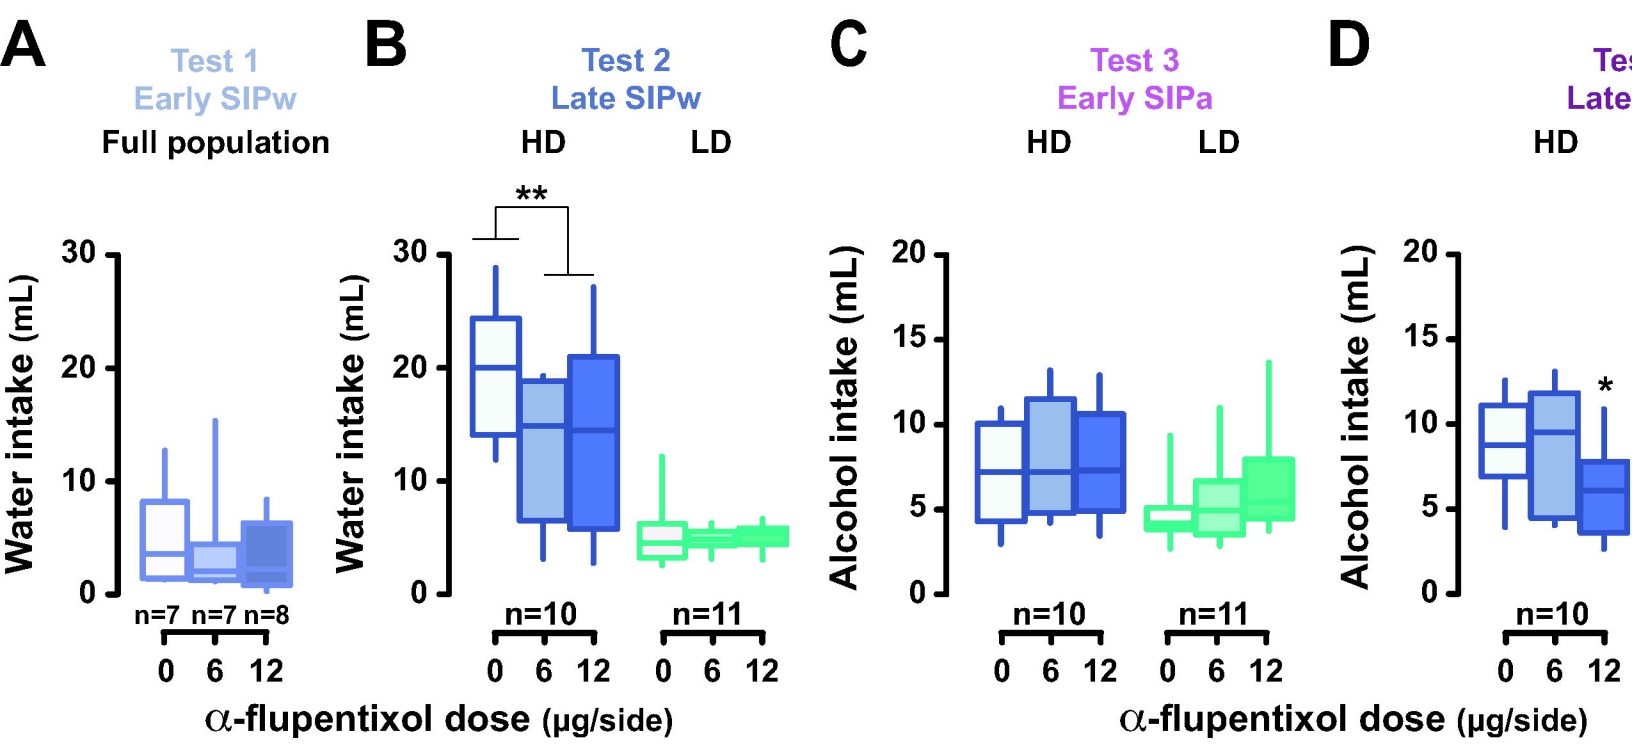

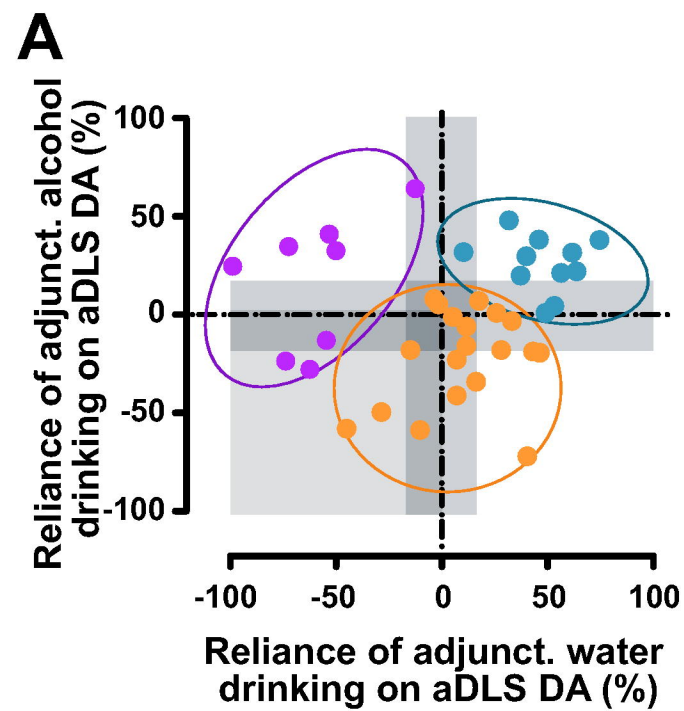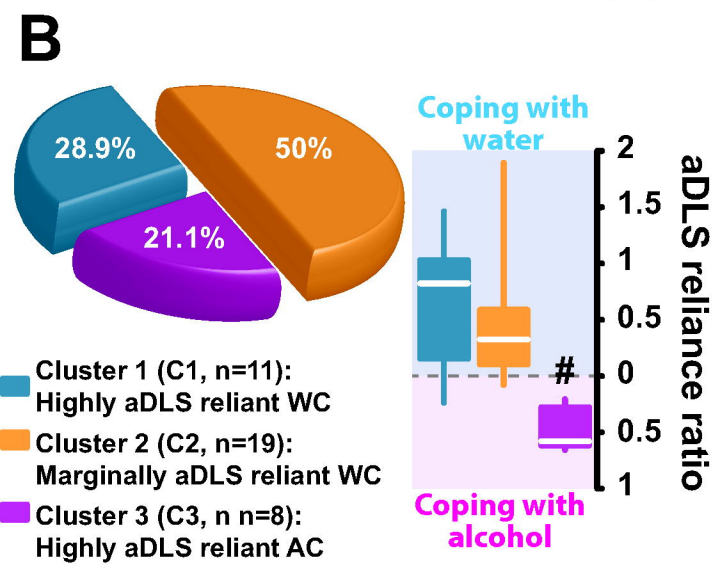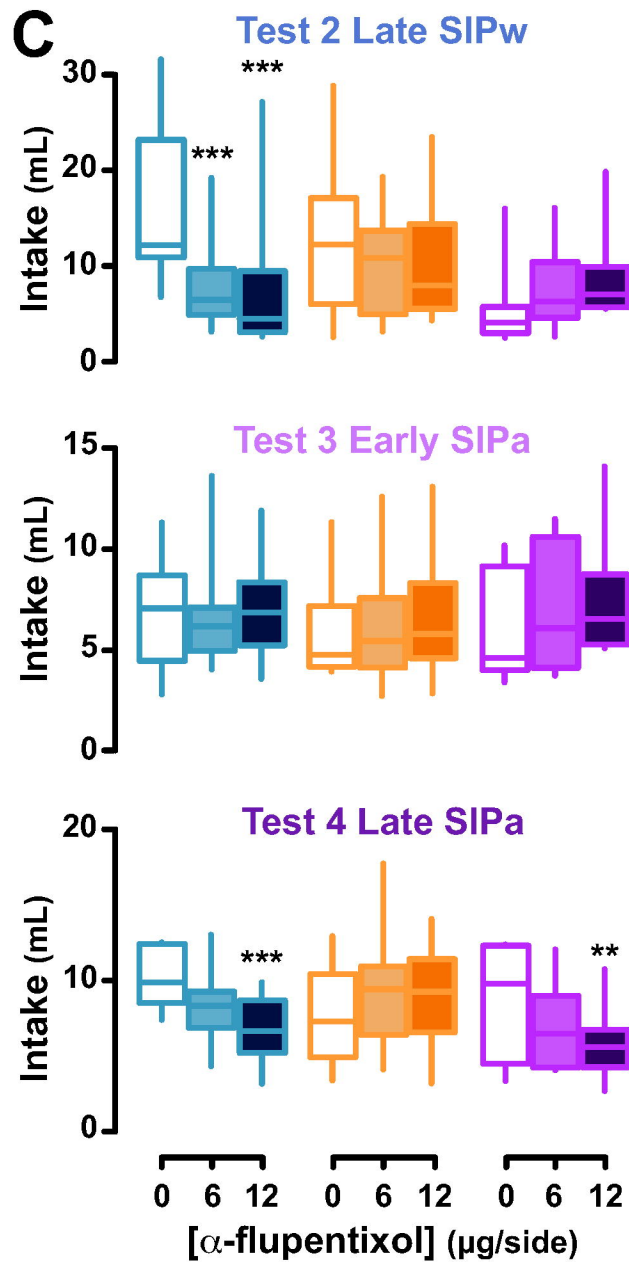

Source: https://www.biorxiv.org/content/10.1101/2022.09.27.509680v1.full.pdf
